# Supplementary material for: The Fishery Performance Indicators: A Management Tool for Triple Bottom Line Outcomes
Source: PubMed Central journal article supplement (PMC4422616; doi:10.1371/journal.pone.0122809), 2015-05-06
Supplement: pone.0122809.s002.pdf [file pone.0122809.s002.pdf]

| Fishery            | Country    | FPIVers | Year | Fishtype        | SingleMulti | OFOverfisher | OFDegOverfi | OFRebuild | OFRegMort |     |
|--------------------|------------|---------|------|-----------------|-------------|--------------|-------------|-----------|-----------|-----|
| Spencer Gulf Praw  | Australia  |         | 1.1  | 2011 Crustacean | Single      |              | 5           | 5         | 5         | 5   |
| Pabna Sadullaspra  | Bangladesh |         | 1.1  | 2010 Finfish    | Multi       |              | 3           | 3         | 2         | 5   |
| Beel Chatra        | Bangladesh |         | 1.1  | 2010 Finfish    | Multi       |              | 3           | 3         | 2         | 5   |
| Kailin Nadi        | Bangladesh |         | 1.1  | 2010 Finfish    | Multi       |              | 3           | 3         | 2         | 5   |
| Shrimp Artisanal   | Colombia   |         | 1.1  | 2010 Crustacean | Single      |              | 1           | 1         | 1         | 5   |
| Shrimp Industrial  | Colombia   |         | 1.1  | 2010 Crustacean | Single      |              | 1           | 1         | 1         | 5   |
| Industrial Tuna    | Ecuador    |         | 1.2  | 2013 Finfish    | Multi       |              | 4           | 4         | 4         | 5   |
| Artisanal Sole and | Gambia     | 1.0.1   |      | 2010 Finfish    | Multi       |              | 3           | 4         | 3         | 5   |
| TRY Oysters        | Gambia     |         | 1.1  | 2010 Shellfish  | Single      |              | 1           | 3         | 2         | 5   |
| Artisanal          | Ghana      |         | 1.1  | 2010 Finfish    | Multi       |              | 2           | 3         | 2         | 4   |
| Artisanal Axim     | Ghana      |         | 1.1  | 2013 Finfish    | Multi       |              | 1           | 2         | 1         | 5   |
| Lobster (Nephrops  | Iceland    |         | 1.1  | 2010 Crustacean | Single      |              | 5           | 5         | 5         | 5   |
| Lesser Sunda Artis | Indonesia  |         | 1.1  | 2010 Finfish    | Multi       |              | 3           | 3         | 2         | 5   |
| Blue Crab          | Indonesia  | 1.0.1   |      | 2010 Crustacean | Single      |              | 1           | 2         | 1         | 4   |
| Longline Tuna      | Indonesia  |         | 1.2  | 2013 Finfish    | Multi       |              | 3           | 4         | 4         | 5   |
| Suruga Pink Shrim  | Japan      |         | 1.1  | 2010 Crustacean | Single      |              | 5           | 5         | 5         | 5   |
| Tokyo Bay          | Japan      |         | 1.2  | 2013 Finfish    | Multi       |              | 3           | 3         | 2         | 5   |
| Artisanal Shimoni  | Kenya      |         | 1.1  | 2013 Finfish    | Multi       |              | 2           | 2         | 1         | 5   |
| Octopus            | Kenya      |         | 1.1  | 2013 Cephalopod | Single      |              | 1           | 2         | 1         | 5   |
| Artisanal Westpoir | Liberia    | 1.0.1   |      | 2011 Finfish    | Multi       |              | 1           | 2         | 1         | 4   |
| Artisanal Robertsp | Liberia    |         | 1.1  | 2013 Finfish    | Multi       |              | 3           | 3         | 4         | 5   |
| Semi-Industrial    | Liberia    |         | 1.1  | 2013 Finfish    | Multi       |              | 3           | 3         | 4         | 5   |
| Lake Chiuta        | Malawi     |         | 1.1  | 2013 Finfish    | Multi       |              | 4           | 4         | 3         | 4   |
| Skipjack Tuna      | Maldives   |         | 1.1  | 2013 Finfish    | Single      |              | 5           | 5         | 5         | 5   |
| La Paz Bivalves    | Mexico     |         | 1.2  | 2011 Shellfish  | Multi       |              | 1           | 1         | 1         | 5   |
| La Paz Bivalves    | Mexico     |         | 1.2  | 2013 Shellfish  | Multi       |              | 1           | 1         | 3         | 5   |
| La Paz Bay Chocola | Mexico     |         | 1.2  | 2013 Shellfish  | Single      |              | 1           | 3         | 3         | 4   |
| Purse Seine Tuna   | Mexico     |         | 1.2  | 2013 Finfish    | Single      |              | 3           | 3         | 3         | 5   |
| Central Zone       | Morocco    |         | 1.1  | 2013 Finfish    | Multi       |              | 3           | 2         | 1         | 4.5 |
| Southern Zone      | Morocco    |         | 1.1  | 2013 Finfish    | Multi       |              | 3           | 4         | 5         | 3   |

| Fishery            | OFSelectivity | OFIUU | OFHabitat | OFCertified | OHLandings | OHexCapacit | OHSeasonLe | OHSafety | OAAssetEarn |
|--------------------|---------------|-------|-----------|-------------|------------|-------------|------------|----------|-------------|
| Spencer Gulf Praw  | 1             | 5     | 4         | 5           | 4          | 5           | 2          | 5        | 3           |
| Pabna Sadullaspra  | 5             | 3     | 3         | 1           | 4          | 2           | 5          | 5        | 3           |
| Beel Chatra        | 5             | 5     | 4         | 1           | 5          | 3           | 5          | 5        | 5           |
| Kailin Nadi        | 5             | 4     | 4         | 1           | 5          | 1           | 5          | 5        | 1           |
| Shrimp Artisanal   | 3             | 2     | 4         | 1           | 1          | 2           | 3          | 4        | 1           |
| Shrimp Industrial  | 3             | 3     | 4         | 1           | 1          | 2           | 3          | 4        | 1           |
| Industrial Tuna    | 4             | 4     | 5         | 1           | 4          | 3           | 4          | 3        | 1           |
| Artisanal Sole and | 2             | 5     | 5         | 1           | 4          | 3           | 5          | 1        | 1           |
| TRY Oysters        | 3             | 4     | 5         | 1           | 1          | 2           | 2          | 1        | 1           |
| Artisanal          | 1             | 3     | 3         | 1           | 1          | 3           | 5          | 5        |             |
| Artisanal Axim     | 4             | 2     | 3         | 2           | 2          | 2           | 5          | 5        | 1           |
| Lobster (Nephrops  | 5             | 5     | 5         | 5           | 5          | 5           | 5          | 5        | 5           |
| Lesser Sunda Artis | 5             | 3     | 3         | 1           | 2          | 2           | 5          | 1        | 1           |
| Blue Crab          | 5             | 3     | 3         | 1           | 2          | 1           | 2          | 3        | 1           |
| Longline Tuna      | 5             | 2     | 5         | 1           | 4          | 1           | 5          | 3        | 1           |
| Suruga Pink Shrim  | 5             | 5     | 4         | 1           | 4          | 4           | 5          | 5        | 1           |
| Tokyo Bay          | 5             | 4     | 3         | 1           | 4          | 4           | 5          | 2        | 1           |
| Artisanal Shimoni  | 5             | 2     | 3         | 1           | 1          | 1           | 5          | 2        | 1           |
| Octopus            | 5             | 1     | 3         | 1           | 1          | 1           | 5          | 3        | 1           |
| Artisanal Westpoir | 3             | 4     | 3         | 1           | 2          | 4           | 5          | 5        | 2           |
| Artisanal Robertsp | 4             | 4     | 4         | 1           | 4          | 3           | 5          | 1        | 1           |
| Semi-Industrial    | 4             | 4     | 4         | 1           | 4          | 3           | 5          | 2        | 1           |
| Lake Chiuta        | 3             | 2     | 3         | 1           | 4          | 3           | 5          | 5        | 3           |
| Skipjack Tuna      | 4             | 4     | 5         | 5           | 4          | 3           | 5          | 5        | 1           |
| La Paz Bivalves    | 5             | 1     | 4         | 1           | 1          | 1           | 5          | 5        | 1           |
| La Paz Bivalves    | 5             | 4     | 3         | 1           | 3          | 1           | 1          | 5        | 1           |
| La Paz Bay Chocola | 5             | 2     | 5         | 1           | 2          | 3           | 3          | 5        | 1           |
| Purse Seine Tuna   | 4             | 3     | 5         | 1           | 4          | 4           | 5          | 5        | 1           |
| Central Zone       | 4             | 4     | 5         | 1           | 3          | 1           | 5          |          | 2           |
| Southern Zone      | 3.5           | 5     | 5         | 1           | 5          | 5           | 5          |          | 5           |

| Fishery            | OATotRevenue | OAAsetVal | OALoanRate | OALoanSource | OACapFunction | ORAnnRevVc | ORAnnLandV | ORIntraAnnL | ORAnnPriceV |
|--------------------|--------------|-----------|------------|--------------|---------------|------------|------------|-------------|-------------|
| Spencer Gulf Praw  | 2            | 2         | 4          | 3            | 4             | 4          | 5          | 4           | 4           |
| Pabna Sadullaspra  | 5            | 5         |            | 1            | 2             | 4          | 3          | 2           | 5           |
| Beel Chatra        | 5            | 5         |            | 1            | 3             | 4          | 3          | 3           | 5           |
| Kailin Nadi        | 5            | 5         |            | 1            | 2             | 4          | 3          | 2           | 5           |
| Shrimp Artisanal   | 2            | 5         | 2          | 2            | 2             | 2          | 2          | 3           | 4           |
| Shrimp Industrial  | 2            | 5         | 3          | 3            | 2             | 2          | 2          | 3           | 4           |
| Industrial Tuna    | 3            | 5         | 5          | 4            | 4             | 2          | 3          | 5           | 2           |
| Artisanal Sole and | 2            | 5         | 2          | 2            | 3             | 2          | 2          | 4           | 5           |
| TRY Oysters        | 4            | 1         | 2          | 1            | 3             | 4          | 4          | 3           | 5           |
| Artisanal          |              |           | 2          | 2            | 3             | 3          | 2          | 3           | 3           |
| Artisanal Axim     | 1            | 5         | 1          | 2            | 3             | 5          | 5          | 2           | 2           |
| Lobster (Nephrops  | 5            | 2         | 4          | 5            | 4             | 4          | 5          | 2           | 5           |
| Lesser Sunda Artis | 4            | 5         | 2          | 1            | 3             | 4          | 4          | 4           | 4           |
| Blue Crab          | 3            | 5         | 1          | 2            | 3             | 3          | 3          | 3           | 4           |
| Longline Tuna      | 5            | 5         | 5          | 4            | 2             | 2          | 3          | 1           | 2           |
| Suruga Pink Shrim  | 5            | 5         | 4          | 3            | 4             | 2          | 1          | 3           | 1           |
| Tokyo Bay          | 2            | 2         | 3          | 4            | 3             | 3          | 2          |             | 3           |
| Artisanal Shimoni  | 5            | 5         | 2          | 2            | 2             | 3          | 3          | 1           | 3           |
| Octopus            | 5            | 5         |            | 2            | 3             | 2          | 2          | 2           | 3           |
| Artisanal Westpoir |              |           |            | 2            | 2             | 2          | 1          | 3           | 2           |
| Artisanal Robertsp | 4            | 5         | 4          | 2            | 3             | 3          | 3          | 2           | 3           |
| Semi-Industrial    | 4            | 5         | 4          | 2            | 3             | 3          | 3          | 2           | 3           |
| Lake Chiuta        | 3            | 4         | 2          | 2            | 3             | 3          | 4          | 3           | 3           |
| Skipjack Tuna      | 5            | 5         | 4          | 4            | 5             | 2          | 2          | 2           | 3           |
| La Paz Bivalves    | 2            | 5         | 1          | 2            | 2             | 1          | 1          | 1           | 3           |
| La Paz Bivalves    | 1            | 5         | 1          | 2            | 2             | 1          | 1          | 1           | 3           |
| La Paz Bay Chocola | 2            | 5         | 1          | 2            | 2             | 2          | 2          | 2           | 2           |
| Purse Seine Tuna   | 5            | 5         | 5          | 5            | 4             | 3          | 4          | 1           | 2           |
| Central Zone       | 3            | 4         | 3          | 3            | 3.5           | 5          | 5          | 2           | 4           |
| Southern Zone      | 5            | 5         | 3          | 3            | 3.5           | 2          | 2          | 2           | 2           |

| Fishery            | ORIntrAnnPr | ORSpatialPri | ORContest | OOEarnings | OOWage | OOEdAccess | OOHealthAcc | OOSocialStar | OONonreside |
|--------------------|-------------|--------------|-----------|------------|--------|------------|-------------|--------------|-------------|
| Spencer Gulf Praw  | 4           | 5            | 5         | 4          | 5      | 5          | 5           | 5            | 4           |
| Pabna Sadullaspra  | 3           |              | 4         | 1          | 1      | 2          | 3           | 2            | 5           |
| Beel Chatra        | 3           |              | 4         | 5          | 5      | 5          | 3           | 5            | 5           |
| Kailin Nadi        | 3           |              | 4         | 2          | 2      | 4          | 3           | 3            | 5           |
| Shrimp Artisanal   | 3           | 5            | 3         | 3          | 3      | 2          | 2           | 2            | 5           |
| Shrimp Industrial  | 3           | 5            | 3         | 4          | 4      | 4          | 3           | 4            | 5           |
| Industrial Tuna    | 4           | 5            | 4         | 5          | 5      | 5          | 4           | 5            | 5           |
| Artisanal Sole and | 5           | 5            | 4         | 5          | 5      | 3          | 3           | 4            | 3           |
| TRY Oysters        | 4           | 5            | 3         | 1          | 1      | 1          | 1           | 1            | 4           |
| Artisanal          | 3           | 3            | 1         | 3          | 3      | 3          | 2           | 5            | 2           |
| Artisanal Axim     | 2           | 4            | 4         | 5          | 5      | 4          | 2           | 3            | 5           |
| Lobster (Nephrops  |             | 5            | 4         | 4          | 4      | 5          | 5           | 4            | 4           |
| Lesser Sunda Artis | 4           | 1            | 3         | 4          | 4      | 4          | 2           | 3            | 4           |
| Blue Crab          | 4           | 5            | 4         | 5          | 5      | 4          | 2           | 5            | 3           |
| Longline Tuna      | 2           | 4            | 5         | 5          | 5      | 5          | 5           | 3            | 5           |
| Suruga Pink Shrim  | 3           | 5            | 5         | 5          | 4      | 4          | 5           | 4            | 5           |
| Tokyo Bay          |             |              | 4         |            | 4      | 5          | 5           | 5            | 5           |
| Artisanal Shimoni  | 1           | 2            | 5         | 4          | 4      | 2          | 2           | 3            | 4           |
| Octopus            | 2           | 4            | 5         | 5          | 5      | 3          | 3           | 4            | 5           |
| Artisanal Westpoir |             |              | 5         | 5          | 5      | 5          | 2           | 2            | 2           |
| Artisanal Robertsp | 2           | 2            | 3         | 3          | 4      | 4          | 2           | 5            | 4           |
| Semi-Industrial    | 2           | 2            | 3         | 4          | 4      | 4          | 2           | 5            | 1           |
| Lake Chiuta        | 4           | 4            | 4         | 3          | 2      | 3          | 2           | 2            | 5           |
| Skipjack Tuna      | 3           | 5            | 5         | 5          | 5      | 3          | 3           | 5            | 5           |
| La Paz Bivalves    | 2           | 3            | 2         | 2          | 2      | 3          | 2           | 2            | 5           |
| La Paz Bivalves    | 2           | 3            | 3         | 2          | 5      | 4          | 3           | 2            | 5           |
| La Paz Bay Chocola | 4           | 2            | 3         | 3          | 4      | 4          | 3           | 3            | 5           |
| Purse Seine Tuna   | 2           | 5            | 5         | 5          | 5      | 5          | 4           | 4            | 5           |
| Central Zone       | 3           | 4            | 3         | 5          | 5      | 5          | 5           | 4            | 5           |
| Southern Zone      | 4           | 4            | 3         | 5          | 5      | 5          | 5           | 5            | 3           |

| Fishery            | OCEarnings | OCWage | OCEdAccess | OCHealthAcc | OCSocialStan | OCNonreside | OCExperienc | OCAge | OSPrice |
|--------------------|------------|--------|------------|-------------|--------------|-------------|-------------|-------|---------|
| Spencer Gulf Praw  | 3          | 5      | 5          | 5           | 4            | 4           | 5           | 4     | 2       |
| Pabna Sadullaspra  | 1          | 1      | 1          | 3           | 2            | 5           | 4           | 3     | 5       |
| Beel Chatra        | 5          | 5      | 4          | 3           | 3            | 5           | 4           | 5     | 5       |
| Kailin Nadi        |            |        |            |             |              |             | 5           | 2     | 5       |
| Shrimp Artisanal   |            |        |            |             |              |             | 5           | 5     | 3       |
| Shrimp Industrial  | 3          | 3      | 3          | 2           | 3            | 5           | 5           | 5     | 3       |
| Industrial Tuna    | 4          | 4      | 4          | 4           | 3            | 5           | 5           | 4     | 5       |
| Artisanal Sole and | 4          | 4      | 2          | 3           | 3            | 2           | 4           | 5     | 5       |
| TRY Oysters        | 1          | 1      | 1          | 1           | 1            | 4           | 5           | 3     | 5       |
| Artisanal          | 3          | 3      | 4          | 4           | 2            | 2           | 5           | 5     | 1       |
| Artisanal Axim     | 4          | 5      | 4          | 2           | 2            | 5           | 5           | 5     | 3       |
| Lobster (Nephrops  | 5          | 5      | 5          | 5           | 3            | 3           | 4           | 5     | 5       |
| Lesser Sunda Artis | 3          | 3      | 2          | 2           | 2            | 3           | 4           | 5     | 4       |
| Blue Crab          | 5          | 5      | 2          | 2           | 2            | 3           | 4           | 5     | 2       |
| Longline Tuna      | 5          | 4      | 4          | 2           | 2            | 5           | 5           | 4     | 5       |
| Suruga Pink Shrim  | 3          | 4      | 5          | 5           | 3            | 4           | 4           | 4     | 4       |
| Tokyo Bay          |            | 3      | 4          | 5           | 3            | 5           | 4           | 2     | 5       |
| Artisanal Shimoni  | 4          | 4      | 2          | 2           | 2            | 4           | 4           | 3     | 4       |
| Octopus            | 4          | 4      | 2          | 2           | 2            | 5           | 3           | 3     | 4       |
| Artisanal Westpoir | 2          | 2      | 4          | 2           | 2            | 2           | 4           | 2     |         |
| Artisanal Robertsp | 4          | 4      | 4          | 2           | 4            | 4           | 5           | 5     | 3       |
| Semi-Industrial    | 4          | 4      | 4          | 2           | 4            | 2           | 5           | 4     | 3       |
| Lake Chiuta        | 4          | 4      | 3          | 3           | 3            | 5           | 5           | 3     | 2       |
| Skipjack Tuna      | 5          | 5      | 4          | 3           | 3            | 5           | 4           | 4     | 5       |
| La Paz Bivalves    | 2          | 2      | 3          | 2           | 2            | 5           | 5           | 4     | 4       |
| La Paz Bivalves    | 2          | 5      | 4          | 3           | 2            | 5           | 5           | 4     | 5       |
| La Paz Bay Chocola | 2          | 4      | 3          | 3           | 2            | 5           | 5           | 3     | 2       |
| Purse Seine Tuna   | 5          | 5      | 5          | 4           | 4            | 5           | 4           | 5     | 4       |
| Central Zone       | 5          | 5      | 3          | 5           | 2            | 5           | 4           | 5     | 5       |
| Southern Zone      | 5          | 5      | 4          | 5           | 3            | 4           | 4           | 4     | 2       |

| Fishery            | OSFinalMark | OSExport | OSFinalWeal | OSRelativePr | OSUSEUExpo | OSMargin | OPYield | OPShrink | OPUtilization |
|--------------------|-------------|----------|-------------|--------------|------------|----------|---------|----------|---------------|
| Spencer Gulf Praw  | 5           | 1        | 5           | 5            | 5          | 4        | 5       | 5        | 4             |
| Pabna Sadullaspra  | 3           | 2        | 1           | 2            | 2          | 3        | 4       | 3        | 5             |
| Beel Chatra        | 3           | 2        | 1           | 2            | 2          | 3        | 4       | 3        | 5             |
| Kailin Nadi        | 3           | 2        | 1           | 2            | 2          | 3        | 4       | 3        | 5             |
| Shrimp Artisanal   | 3           | 2        | 2           | 2            | 5          | 2        | 4       | 4        | 3             |
| Shrimp Industrial  | 4           | 4        | 5           | 3            | 5          | 3        | 4       | 4        | 3             |
| Industrial Tuna    | 3           | 3        | 4           | 3            | 5          | 3        | 5       | 5        | 5             |
| Artisanal Sole and | 3           | 2        | 5           | 2            | 3          | 4        | 3       | 2        | 2             |
| TRY Oysters        | 2           | 1        | 1           | 1            | 1          |          | 2       | 1        | 4             |
| Artisanal          | 3           | 2        | 1           | 1            | 2          | 2        | 1       | 2        | 5             |
| Artisanal Axim     | 3           | 2        | 1           | 2            | 4          | 2        | 5       | 3        | 5             |
| Lobster (Nephrops  | 4           | 5        | 5           | 3            | 5          | 4        | 4       | 4        | 4             |
| Lesser Sunda Artis | 3           | 4        | 4           | 4            | 4          | 5        | 4       | 1        | 2             |
| Blue Crab          | 4           | 5        | 5           | 4            | 5          | 3        | 4       | 3        | 5             |
| Longline Tuna      | 4           | 5        | 5           | 2            | 5          | 5        | 3       | 4        | 2             |
| Suruga Pink Shrim  | 4           | 1        | 4           | 4            | 4          | 4        | 5       | 5        | 3             |
| Tokyo Bay          | 4           | 1        | 5           | 5            | 5          | 5        | 5       | 5        | 5             |
| Artisanal Shimoni  | 3           | 2        | 1           | 1            | 2          | 2        | 4       | 4        | 5             |
| Octopus            | 5           | 5        | 4           | 2            | 4          | 5        | 5       | 4        | 5             |
| Artisanal Westpoir | 4           | 2        | 5           | 3            | 2          | 1        | 3       | 4        | 5             |
| Artisanal Robertsp | 3           | 1        | 1           | 1            | 1          | 3        | 5       | 4        | 5             |
| Semi-Industrial    | 3           | 1        | 1           | 1            | 1          | 3        | 5       | 4        | 5             |
| Lake Chiuta        | 3           | 1        | 1           | 1            | 1          | 3        | 2       | 3        | 4             |
| Skipjack Tuna      | 3           | 4        | 5           | 3            | 5          | 2        | 4       | 4        | 2             |
| La Paz Bivalves    | 4           | 1        | 2           | 2            | 1          | 2        | 4       | 5        | 2             |
| La Paz Bivalves    | 3           | 1        | 2           | 2            | 1          | 3        | 3       | 4        | 1             |
| La Paz Bay Chocola | 4           | 1        | 2           | 3            | 1          | 3        | 4       | 4        | 5             |
| Purse Seine Tuna   | 5           | 5        | 5           | 5            | 5          | 5        | 5       | 4        | 4             |
| Central Zone       | 1.5         | 3        | 3           | 5            | 5          | 4        | 3       | 2        | 2             |
| Southern Zone      | 3           | 4        | 3           | 5            | 5          | 4        | 4       | 2        | 2             |

| Fishery                | OPImprovement | OPSanitation | OPSupport | OBLoanRate | OBLoanSource | OBCapFunction | OMEarnings | OMWage | OMEdAccess |
|------------------------|---------------|--------------|-----------|------------|--------------|---------------|------------|--------|------------|
| Spencer Gulf Prawns    | 4             | 5            | 5         | 4          | 3            | 4             | 4          | 5      | 5          |
| Pabna Sadullasprangi   | 1             | 2            | 3         |            | 1            | 1             | 5          | 5      | 4          |
| Beel Chatra            | 1             | 2            | 3         |            | 1            | 1             | 5          | 5      | 4          |
| Kailin Nadi            | 1             | 2            | 3         |            | 1            | 1             | 5          | 5      | 4          |
| Shrimp Artisanal       | 2             | 5            | 3         | 4          | 4            | 2             | 5          | 5      | 5          |
| Shrimp Industrial      | 5             | 5            | 3         | 4          | 4            | 2             | 5          | 5      | 5          |
| Industrial Tuna        | 5             | 4            | 4         | 5          | 4            | 3             | 5          | 5      | 5          |
| Artisanal Sole and     | 1             | 2            | 4         | 4          | 4            | 4             | 5          | 5      | 4          |
| TRY Oysters            | 1             | 2            | 5         | 2          | 1            | 1             | 1          | 1      | 1          |
| Artisanal              | 2             | 2            | 3         | 2          | 2            | 4             | 4          | 4      | 4          |
| Artisanal Axim         | 2             | 3            | 2         | 2          | 2            | 4             | 5          | 5      | 4          |
| Lobster (Nephrops)     | 5             | 5            | 5         | 4          | 4            | 4             | 5          | 4      | 5          |
| Lesser Sunda Artisanal | 3             | 4            | 4         | 3          | 3            | 3             | 5          | 5      | 5          |
| Blue Crab              | 5             | 3            | 4         | 4          | 2            | 4             | 5          | 3      | 5          |
| Longline Tuna          | 5             | 1            | 2         | 4          | 4            | 4             | 5          | 5      | 5          |
| Suruga Pink Shrimp     | 5             | 5            | 5         | 4          | 4            | 3             | 3          | 3      | 5          |
| Tokyo Bay              | 5             | 5            | 5         | 4          | 4            | 3             |            | 4      | 5          |
| Artisanal Shimoni      | 1             | 2            | 2         | 2          | 2            | 3             | 4          | 4      | 2          |
| Octopus                | 4             | 5            | 3         |            | 3            | 4             | 5          | 5      | 4          |
| Artisanal Westpoir     | 2             | 1            | 2         |            | 2            | 4             | 3          | 5      | 4          |
| Artisanal Robertsp     | 2             | 2            | 1         | 4          | 2            | 5             | 5          | 5      | 3          |
| Semi-Industrial        | 2             | 2            | 1         | 4          | 2            | 4             | 5          | 5      | 3          |
| Lake Chiuta            | 1             |              | 1         | 2          | 2            | 5             | 2          | 3      | 2          |
| Skipjack Tuna          | 2             | 3            | 3         | 4          | 3            | 2             | 5          | 5      | 4          |
| La Paz Bivalves        | 1             | 3            | 5         | 5          | 4            | 2             | 1          | 1      | 3          |
| La Paz Bivalves        | 1             | 3            | 5         | 5          | 4            | 2             | 1          | 1      | 3          |
| La Paz Bay Chocolate   | 3             | 3            | 5         | 5          | 4            | 3             | 5          | 5      | 5          |
| Purse Seine Tuna       | 5             | 3            | 5         | 5          | 5            | 4             | 5          | 5      | 5          |
| Central Zone           | 3             |              | 4         | 3          | 3            | 1             | 5          | 5      | 5          |
| Southern Zone          | 3             |              | 1         | 3          | 3            | 4             | 5          | 5      | 5          |

| Fishery            | OMHealthAc | OMSocialSta | OMNonresid | OWEarnings | OWWage | OWEdAccess | OWHealthAc | OWSocialSta | OWNonresid |
|--------------------|------------|-------------|------------|------------|--------|------------|------------|-------------|------------|
| Spencer Gulf Praw  | 5          | 4           | 5          | 3          | 3      | 5          | 5          | 3           | 4          |
| Pabna Sadullaspra  | 3          | 4           | 5          | 2          | 2      | 2          | 3          | 1           | 5          |
| Beel Chatra        | 3          | 4           | 5          | 2          | 2      | 2          | 3          | 1           | 5          |
| Kailin Nadi        | 3          | 4           | 5          | 2          | 2      | 2          | 3          | 1           | 5          |
| Shrimp Artisanal   | 4          | 5           | 5          | 3          | 3      | 5          | 4          | 3           | 5          |
| Shrimp Industrial  | 4          | 5           | 5          | 3          | 3      | 5          | 4          | 3           | 5          |
| Industrial Tuna    | 4          | 5           | 4          | 3          | 3      | 4          | 4          | 2           | 5          |
| Artisanal Sole and | 4          | 4           | 2          | 3          | 4      | 4          | 3          | 3           | 3          |
| TRY Oysters        | 1          | 1           | 4          | 1          | 1      | 1          | 1          | 1           | 4          |
| Artisanal          | 4          | 2           | 5          | 4          | 4      | 1          | 3          | 2           | 3          |
| Artisanal Axim     | 2          | 2           | 5          | 5          | 5      | 4          | 2          | 2           | 5          |
| Lobster (Nephrops  | 5          | 4           | 3          | 3          | 4      | 4          | 5          | 2           | 3          |
| Lesser Sunda Artis | 4          | 3           | 4          | 3          | 2      | 3          | 3          | 3           | 5          |
| Blue Crab          | 5          | 3           | 4          | 3          | 3      | 3          | 3          | 3           | 5          |
| Longline Tuna      | 5          | 4           | 3          | 3          | 5      | 3          | 4          | 3           | 5          |
| Suruga Pink Shrim  | 5          | 4           | 5          | 3          | 3      | 4          | 5          | 3           | 5          |
| Tokyo Bay          | 5          | 5           | 5          |            | 3      | 5          | 5          | 4           | 5          |
| Artisanal Shimoni  | 2          | 2           | 4          | 4          | 4      | 2          | 2          | 2           | 4          |
| Octopus            | 4          | 5           | 2          | 5          | 4      | 3          | 3          | 3           | 4          |
| Artisanal Westpoir | 3          | 2           | 1          | 3          | 3      | 4          | 3          | 2           | 1          |
| Artisanal Robertsp | 2          | 5           | 5          | 4          | 3      | 3          | 2          | 3           | 4          |
| Semi-Industrial    | 2          | 5           | 2          | 4          | 3      | 3          | 2          | 3           | 2          |
| Lake Chiuta        | 2          | 3           | 2          | 2          | 2      | 3          | 2          | 3           | 4          |
| Skipjack Tuna      | 3          | 4           | 5          | 3          | 3      | 3          | 2          | 3           | 2          |
| La Paz Bivalves    | 3          | 4           | 5          | 1          | 1      | 2          | 2          | 2           | 5          |
| La Paz Bivalves    | 3          | 4           | 5          | 1          | 1      | 2          | 2          | 2           | 5          |
| La Paz Bay Chocola | 4          | 5           | 4          | 2          | 5      | 4          | 2          | 2           | 5          |
| Purse Seine Tuna   | 4          | 5           | 5          | 5          | 5      | 4          | 3          | 5           | 5          |
| Central Zone       | 5          | 5           | 5          | 4          | 4      | 2.5        | 2          | 3           | 5          |
| Southern Zone      | 5          | 5           | 3          | 4          | 4      | 2          | 2          | 3           | 3          |



| Fishery            | OWExperience | I_EPI | IEDisease | IEDisasters | IEPollutionSh | IEChronicSto | IEChronicCor | IGQuality | IGResponsive |
|--------------------|--------------|-------|-----------|-------------|---------------|--------------|--------------|-----------|--------------|
| Spencer Gulf Praw  | 5            | 5     | 5         | 5           | 5             | 5            | 5            | 5         | 5            |
| Pabna Sadullaspra  | 2            | 1     | 5         | 4           | 3             | 5            | 5            | 2         | 1            |
| Beel Chatra        | 2            | 1     | 5         | 5           | 5             | 5            | 5            | 2         | 1            |
| Kailin Nadi        | 2            | 1     | 4         | 4           | 5             | 5            | 5            | 2         | 1            |
| Shrimp Artisanal   | 5            | 4     | 5         | 5           | 5             | 4            | 5            | 3         | 1            |
| Shrimp Industrial  | 5            | 4     | 5         | 5           | 5             | 4            | 5            | 3         | 1            |
| Industrial Tuna    | 4            | 3     | 5         | 5           | 5             | 5            | 5            | 1         | 2            |
| Artisanal Sole and | 4            | 2     | 5         | 5           | 5             | 5            | 5            | 2         | 2            |
| TRY Oysters        | 3            | 2     | 5         | 5           | 5             | 5            | 5            | 2         | 2            |
| Artisanal          | 5            | 2     | 5         | 5           | 4             | 3            | 4            | 3         | 3            |
| Artisanal Axim     | 5            | 2     | 1         | 1           | 2             | 5            | 5            | 3         | 3            |
| Lobster (Nephrops  | 4            | 4     | 5         | 5           | 5             | 5            | 5            | 5         | 5            |
| Lesser Sunda Artis | 4            | 2     | 5         | 4           | 5             | 5            | 5            | 2         | 2            |
| Blue Crab          | 4            | 3     | 5         | 3           | 4             | 3            | 5            | 2         | 2            |
| Longline Tuna      | 3            | 2     | 5         | 4           | 5             | 5            | 5            | 2         | 2            |
| Suruga Pink Shrim  | 4            | 5     | 5         | 5           | 3             | 4            | 5            | 5         | 5            |
| Tokyo Bay          |              | 4     | 5         | 5           | 5             | 3            | 4            | 5         | 5            |
| Artisanal Shimoni  | 4            | 3     | 5         | 3           | 5             | 5            | 5            | 2         | 2            |
| Octopus            | 3            | 3     | 5         | 3           | 5             | 5            | 5            | 2         | 2            |
| Artisanal Westpoir | 4            | 2     | 4         | 5           | 5             | 4            | 5            | 3         | 3            |
| Artisanal Robertsp | 5            | 2     | 5         | 5           | 2             | 5            | 5            | 2         | 2            |
| Semi-Industrial    | 5            | 2     | 5         | 5           | 2             | 5            | 5            | 2         | 2            |
| Lake Chiuta        | 5            | 2     | 3         | 3           | 5             | 5            | 5            | 3         | 4            |
| Skipjack Tuna      | 3            | 5     | 5         | 4           | 5             | 5            | 5            | 3         | 2            |
| La Paz Bivalves    | 5            | 2     | 4         | 2           | 5             | 4            | 4            | 3         | 2            |
| La Paz Bivalves    | 5            | 2     | 4         | 2           | 5             | 4            | 4            | 3         | 2            |
| La Paz Bay Chocola | 3            | 2     | 4         | 5           | 5             | 5            | 5            | 3         | 2            |
| Purse Seine Tuna   | 4            | 2     | 5         | 5           | 5             | 5            | 5            | 3         | 2            |
| Central Zone       | 1.5          | 1     | 4         | 3           | 4             | 5            | 4            | 3         | 2            |
| Southern Zone      | 1.5          | 1     | 4         | 5           | 4             | 5            | 4            | 3         | 2            |

| Fishery            | INIEF | INGDP | IAProportion | IATransfer | IASecurity | IADurability | IAFlexibility | IAExclusivity | IHProportion |   |
|--------------------|-------|-------|--------------|------------|------------|--------------|---------------|---------------|--------------|---|
| Spencer Gulf Praw  |       | 5     | 5            | 5          | 5          | 5            | 5             | 1             | 5            | 1 |
| Pabna Sadullaspra  |       | 2     | 1            | 4          | 4          | 4            | 2             | 4             | 3            | 4 |
| Beel Chatra        |       | 2     | 1            | 5          | 4          | 4            | 2             | 4             | 4            | 5 |
| Kailin Nadi        |       | 2     | 1            | 5          | 4          | 4            | 2             | 4             | 4            | 5 |
| Shrimp Artisanal   |       | 4     | 3            | 1          | 1          | 1            | 3             | 3             | 1            | 1 |
| Shrimp Industrial  |       | 4     | 3            | 4          | 1          | 1            | 3             | 3             | 1            | 1 |
| Industrial Tuna    |       | 1     | 2            | 2          | 1          | 5            | 5             | 4             | 3            | 1 |
| Artisanal Sole and |       | 3     | 1            | 1          | 1          | 1            | 1             | 3             | 1            | 1 |
| TRY Oysters        |       | 3     | 1            | 4          | 2          | 3            | 4             | 3             | 3            | 2 |
| Artisanal          |       | 3     | 1            | 4          | 1          | 2            | 3             | 1             | 1            | 1 |
| Artisanal Axim     |       | 3     | 1            | 4          | 1          | 4            | 5             | 2             | 2            | 1 |
| Lobster (Nephrops  |       | 4     | 5            | 5          | 4          | 3            | 3             | 4             | 4            | 5 |
| Lesser Sunda Artis |       | 2     | 2            | 3          | 1          | 2            | 3             | 3             | 2            | 1 |
| Blue Crab          |       | 3     | 2            | 1          |            | 4            | 3             | 3             | 3            | 1 |
| Longline Tuna      |       | 2     | 2            | 1          |            | 5            | 5             | 5             | 1            | 1 |
| Suruga Pink Shrim  |       | 4     | 5            | 5          | 2          | 5            | 5             | 3             | 4            | 5 |
| Tokyo Bay          |       | 5     | 5            | 5          | 1          | 5            | 4             | 2             | 3            | 1 |
| Artisanal Shimoni  |       | 2     | 1            | 4          | 1          | 4            | 3             | 3             | 2            | 1 |
| Octopus            |       | 2     | 1            | 4          | 1          | 3            | 3             | 3             | 2            | 1 |
| Artisanal Westpoir |       |       | 1            | 4          | 1          | 4            | 2             | 1             | 2            | 1 |
| Artisanal Robertsp |       | 1     | 1            | 4          | 1          | 2            | 3             | 2             | 2            | 1 |
| Semi-Industrial    |       | 1     | 1            | 4          | 1          | 2            | 3             | 2             | 2            | 1 |
| Lake Chiuta        |       | 2     | 1            | 4          | 1          | 4            | 5             | 3             | 3            | 1 |
| Skipjack Tuna      |       | 1     | 3            | 5          | 1          | 3            | 5             | 5             | 5            | 1 |
| La Paz Bivalves    |       | 4     | 3            | 1          |            | 1            | 1             | 4             | 1            | 1 |
| La Paz Bivalves    |       | 4     | 3            | 4          | 2          | 5            | 5             | 2             | 4            | 4 |
| La Paz Bay Chocola |       | 4     | 3            | 4          | 2          | 5            | 5             | 3             | 3            | 3 |
| Purse Seine Tuna   |       | 4     | 3            | 2          | 1          | 5            | 5             | 5             | 4            | 5 |
| Central Zone       |       | 3     | 2            | 5          | 4          | 3            | 3             | 3             | 4            | 1 |
| Southern Zone      |       | 3     | 2            | 5          | 4          | 3            | 3             | 2             | 4            | 5 |

| Fishery            | IHTransfer | IHSecurity | IHDurability | IHFlexibility | IHExclusivity | IOParticipati | IOMgmtInflu | IOBusInfluen | IPDays |
|--------------------|------------|------------|--------------|---------------|---------------|---------------|-------------|--------------|--------|
| Spencer Gulf Praw  |            |            |              |               |               | 5             | 3           | 3            | 4      |
| Pabna Sadullaspra  | 1          | 3          | 1            | 4             | 3             | 4             | 5           | 5            | 4      |
| Beel Chatra        | 1          | 3          | 1            | 4             | 4             | 3             | 5           | 5            | 4      |
| Kailin Nadi        | 1          | 3          | 1            | 4             | 4             | 5             | 5           | 5            | 4      |
| Shrimp Artisanal   |            |            |              |               |               | 2             | 2           | 1            | 2      |
| Shrimp Industrial  |            |            |              |               |               | 5             | 2           | 1            | 2      |
| Industrial Tuna    |            |            |              |               |               | 4             | 3           | 4            | 3      |
| Artisanal Sole and |            |            |              |               |               | 5             | 2           | 2            | 1      |
| TRY Oysters        | 1          | 2          | 1            | 2             | 2             | 2             | 2           | 2            | 2      |
| Artisanal          |            |            |              |               |               | 3             | 2           | 3            | 3      |
| Artisanal Axim     |            |            |              |               |               | 5             | 4           | 2            | 2      |
| Lobster (Nephrops  | 3          | 3          | 3            | 4             | 4             | 5             | 3           | 5            | 2      |
| Lesser Sunda Artis |            |            |              |               |               | 4             | 3           | 2            | 2      |
| Blue Crab          |            |            |              |               |               | 4             | 3           | 4            | 3      |
| Longline Tuna      |            |            |              |               |               | 2             | 2           | 2            | 4      |
| Suruga Pink Shrim  | 1          | 5          | 5            | 5             | 5             | 5             | 4           | 4            | 5      |
| Tokyo Bay          |            |            |              |               |               | 5             | 3           | 2            | 4      |
| Artisanal Shimoni  |            |            |              |               |               | 5             | 4           | 1            | 4      |
| Octopus            |            |            |              |               |               | 5             | 4           | 1            | 4      |
| Artisanal Westpoir |            |            |              |               |               | 2             | 1           | 5            | 2      |
| Artisanal Robertsp |            |            |              |               |               | 5             | 4           | 1            | 4      |
| Semi-Industrial    |            |            |              |               |               | 5             | 4           | 1            | 4      |
| Lake Chiuta        |            |            |              |               |               | 3             | 4           | 5            | 5      |
| Skipjack Tuna      |            |            |              |               |               | 2             | 4           | 3            | 5      |
| La Paz Bivalves    |            |            |              |               |               | 2             | 1           | 2            | 2      |
| La Paz Bivalves    | 4          | 4          | 2            | 2             | 3             | 4             | 4           | 2            | 4      |
| La Paz Bay Chocola | 4          | 4          | 2            | 4             | 3             | 4             | 4           | 2            | 2      |
| Purse Seine Tuna   | 4          | 5          | 3            | 5             | 4             | 3             | 3           | 1            | 4      |
| Central Zone       |            |            |              |               |               | 4             | 3           | 5            | 5      |
| Southern Zone      | 2          | 2          | 2.5          | 3             | 4             | 4             | 4           | 5            | 5      |

| Fishery            | IPFinancial | ICLeadership | ICCoheision | IWBusInfluer | IWMgmtInflu | IWHarvest | IWPostHarve | IMExpenditu | IMEnforceme |
|--------------------|-------------|--------------|-------------|--------------|-------------|-----------|-------------|-------------|-------------|
| Spencer Gulf Praw  | 5           | 5            | 5           | 1            | 1           | 1         | 2           | 5           | 5           |
| Pabna Sadullaspra  | 3           | 3            | 5           | 1            | 1           | 1         | 1           | 4           | 5           |
| Beel Chatra        | 3           | 5            | 5           | 1            | 1           | 1         | 1           | 5           | 5           |
| Kailin Nadi        | 3           | 4            | 5           | 1            | 1           | 1         | 1           | 5           | 5           |
| Shrimp Artisanal   | 1           | 1            | 4           | 1            | 1           | 1         | 4           | 5           | 1           |
| Shrimp Industrial  | 2           | 2            | 4           | 1            | 1           | 1         | 4           | 5           | 2           |
| Industrial Tuna    | 1           | 4            | 5           | 1            | 1           | 1         | 4           | 5           | 3           |
| Artisanal Sole and | 1           | 3            | 4           | 2            | 2           | 1         | 2           | 5           | 2           |
| TRY Oysters        | 1           | 5            | 3           | 5            | 5           | 5         | 5           | 5           | 2           |
| Artisanal          | 2           | 2            | 3           | 4            | 1           | 1         | 4           | 4           | 2           |
| Artisanal Axim     | 1           | 5            | 5           | 3            | 1           | 1         | 5           | 5           | 4           |
| Lobster (Nephrops  | 4           | 4            | 4           | 1            | 1           | 1         | 2           | 5           | 5           |
| Lesser Sunda Artis | 1           | 4            | 3           | 1            | 2           | 1         | 5           | 5           | 2           |
| Blue Crab          | 1           | 3            | 3           | 2            | 2           | 2         | 2           | 5           | 2           |
| Longline Tuna      | 2           | 4            | 5           | 1            | 2           | 1         | 4           | 5           | 1           |
| Suruga Pink Shrim  | 4           | 5            | 5           | 1            | 1           | 1         | 3           | 4           | 5           |
| Tokyo Bay          | 1           | 5            | 5           | 2            | 2           | 2         | 2           |             | 5           |
| Artisanal Shimoni  | 2           | 3            | 4           | 1            | 1           | 2         | 2           | 2           | 3           |
| Octopus            | 3           | 3            | 5           | 1            | 1           | 2         | 1           | 3           | 3           |
| Artisanal Westpoir | 2           | 5            | 3           |              |             |           |             | 3           | 4           |
| Artisanal Robertsp | 1           | 5            | 3           | 3            | 1           | 1         | 4           | 1           | 3           |
| Semi-Industrial    | 1           | 5            | 3           | 3            | 1           | 1         | 4           | 1           | 3           |
| Lake Chiuta        | 1           | 5            | 4           | 3            | 1           | 2         | 3           | 5           | 5           |
| Skipjack Tuna      | 1           | 5            | 4           | 1            | 1           | 1         | 2           | 5           | 4           |
| La Paz Bivalves    | 1           | 2            | 3           | 2            | 1           | 1         | 1           | 5           | 2           |
| La Paz Bivalves    | 3           | 4            | 4           | 2            | 1           | 1         | 1           | 1           | 4           |
| La Paz Bay Chocola | 4           | 4            | 4           | 2            | 2           | 1         | 1           | 4           | 3           |
| Purse Seine Tuna   | 1           | 5            | 5           | 1            | 1           | 1         | 1           | 5           | 4           |
| Central Zone       | 2           | 4            | 3           |              |             |           |             | 1           | 2           |
| Southern Zone      | 2           | 4            | 3           |              |             |           |             | 1           | 2           |

| Fishery            | IMJurisdiction | IMSubsidies | IDAvailability | IDAnalysis | ILMPAs | ILSpatial | ILTACs | ITPricing | ITPriceAvaila |
|--------------------|----------------|-------------|----------------|------------|--------|-----------|--------|-----------|---------------|
| Spencer Gulf Praw  | 5              | 5           | 5              | 4          | 5      | 5         | 5      | 1         | 3             |
| Pabna Sadullaspra  | 3              | 1           | 3              | 2          | 5      | 5         | 1      | 5         | 2             |
| Beel Chatra        | 3              | 1           | 3              | 2          | 5      | 5         | 1      | 5         | 2             |
| Kailin Nadi        | 3              | 1           | 4              | 2          | 5      | 5         | 1      | 5         | 2             |
| Shrimp Artisanal   | 5              | 4           | 2              | 2          | 5      | 1         | 2      | 4         | 4             |
| Shrimp Industrial  | 5              | 4           | 3              | 2          | 5      | 1         | 2      | 4         | 4             |
| Industrial Tuna    | 4              | 3           | 4              | 3          | 2      | 1         | 1      | 5         | 4             |
| Artisanal Sole and | 1              | 5           | 2              | 2          | 1      | 1         | 1      | 1         | 3             |
| TRY Oysters        | 5              | 5           | 1              | 1          | 1      | 3         | 1      | 1         | 3             |
| Artisanal          | 3              | 4           | 3              | 4          | 1      | 1         | 1      | 5         | 2             |
| Artisanal Axim     | 2              | 2           | 4              | 2          | 1      | 4         | 1      | 5         | 3             |
| Lobster (Nephrops  | 5              | 5           | 5              | 5          | 2      | 1         | 5      | 1         | 5             |
| Lesser Sunda Artis | 3              | 4           | 2              | 3          | 2      | 4         | 1      | 1         | 1             |
| Blue Crab          | 4              | 5           | 3              | 2          | 2      | 1         | 1      | 4         | 2             |
| Longline Tuna      | 3              | 3           | 2              | 1          | 2      | 1         | 1      | 1         | 2             |
| Suruga Pink Shrim  | 5              | 4           | 4              | 3          | 1      | 5         | 5      | 5         | 4             |
| Tokyo Bay          | 3              | 4           | 4              | 3          | 2      | 5         | 3      | 5         | 2             |
| Artisanal Shimoni  | 4              | 5           | 2              | 1          | 2      | 4         | 1      | 4         | 2             |
| Octopus            | 5              | 5           | 3              | 1          | 2      | 5         | 1      | 1         | 2             |
| Artisanal Westpoir | 3              | 5           | 2              | 2          | 1      | 1         | 3      | 4         | 2             |
| Artisanal Robertsp | 3              | 5           | 2              | 2          | 2      | 2         | 1      | 2         | 1             |
| Semi-Industrial    | 3              | 5           | 2              | 2          | 2      | 2         | 1      | 2         | 1             |
| Lake Chiuta        | 5              | 5           | 3              | 2          | 1      | 4         | 1      | 3         | 1             |
| Skipjack Tuna      | 4              | 2           | 3              | 4          | 1      | 4         | 1      | 1         | 3             |
| La Paz Bivalves    | 5              | 3           | 2              | 1          | 1      | 1         | 1      | 1         | 2             |
| La Paz Bivalves    | 5              | 3           | 4              | 4          | 5      | 4         | 1      | 1         | 2             |
| La Paz Bay Chocola | 5              | 3           | 3              | 4          | 2      | 4         | 3      | 2         | 2             |
| Purse Seine Tuna   | 5              | 4           | 3              | 3          | 1      | 1         | 1      | 1         | 3             |
| Central Zone       | 5              | 2           | 4.5            | 3          | 2      | 2         | 1      | 2         | 4             |
| Southern Zone      | 3              | 2           | 4.5            | 3          | 2      | 2         | 1      | 2         | 4             |

| Fishery            | ITBuyers | ITVerticalInte | ITTariffs | ITNonTariffs | IIShipping | IIRoads | IITechnology | IIExtension | IIElectricity |
|--------------------|----------|----------------|-----------|--------------|------------|---------|--------------|-------------|---------------|
| Spencer Gulf Praw  | 4        | 2              | 5         | 5            | 5          | 3       | 5            | 5           | 5             |
| Pabna Sadullaspra  | 5        | 1              |           | 2            | 4          | 2       | 2            | 4           | 2             |
| Beel Chatra        | 5        | 1              |           | 2            | 4          | 2       | 3            | 4           | 2             |
| Kailin Nadi        | 5        | 1              | 5         | 2            | 4          | 2       | 2            | 4           | 2             |
| Shrimp Artisanal   | 4        | 1              | 5         | 5            | 4          | 3       | 2            | 2           | 4             |
| Shrimp Industrial  | 4        | 2              | 5         | 4            | 4          | 3       | 4            | 2           | 4             |
| Industrial Tuna    | 4        | 2              | 1         | 4            | 5          | 3       | 5            | 5           | 4             |
| Artisanal Sole and | 1        | 1              | 4         | 4            | 4          | 2       | 2            | 3           | 3             |
| TRY Oysters        | 5        | 5              | 5         | 1            | 3          | 3       | 2            | 4           | 4             |
| Artisanal          | 5        | 1              | 5         | 3            | 3          | 4       | 2            | 3           | 2             |
| Artisanal Axim     | 3        | 1              | 2         | 5            | 4          | 3       | 3            | 2           | 5             |
| Lobster (Nephrops  | 2        | 5              | 5         | 5            | 4          | 4       | 5            | 5           | 5             |
| Lesser Sunda Artis | 1        | 4              | 3         | 4            | 4          | 2       | 2            | 1           | 1             |
| Blue Crab          | 5        | 3              | 1         | 4            | 4          | 2       | 4            | 1           | 4             |
| Longline Tuna      | 1        | 1              | 5         | 1            | 2          | 1       | 1            | 3           | 3             |
| Suruga Pink Shrim  | 5        | 1              | 5         | 5            | 4          | 5       | 5            | 4           | 5             |
| Tokyo Bay          | 5        | 1              | 2         | 4            | 4          | 5       | 5            | 4           | 5             |
| Artisanal Shimoni  | 5        | 1              | 5         | 5            | 4          | 1       | 2            | 3           | 2             |
| Octopus            | 2        | 1              | 5         | 5            | 4          | 1       | 2            | 3           | 2             |
| Artisanal Westpoir | 5        | 4              | 4         | 5            | 3          | 1       | 4            | 2           | 1             |
| Artisanal Robertsp | 5        | 2              | 2         | 5            | 1          | 1       | 2            | 2           | 2             |
| Semi-Industrial    | 5        | 2              | 2         | 5            | 1          | 1       | 2            | 2           | 2             |
| Lake Chiuta        | 5        | 4              | 1         | 1            | 1          | 3       | 2            | 2           | 1             |
| Skipjack Tuna      | 3        | 1              | 5         | 5            | 2          |         | 4            | 2           | 3             |
| La Paz Bivalves    | 4        | 2              | 4         | 4            | 2          | 3       | 2            | 2           | 3             |
| La Paz Bivalves    | 4        | 2              | 4         | 4            | 2          | 3       | 3            | 5           | 3             |
| La Paz Bay Chocola | 4        | 1              | 4         | 4            | 2          | 3       | 3            | 2           | 3             |
| Purse Seine Tuna   | 3        | 1              | 3         | 5            | 5          |         | 5            | 5           | 5             |
| Central Zone       | 1        | 1              | 4         | 4            | 3.5        | 3       | 4            | 3.5         | 4.5           |
| Southern Zone      | 1        | 4              | 4         | 4            | 1          | 2       | 4            | 3.5         | 4.5           |

| Fishery            | Illce | QOFCertified | QOFOverfish | QOFDegOver | QOFRebuild | QOFRegMort | QOFSelectivi | QOFIUU | QOFHabitat |
|--------------------|-------|--------------|-------------|------------|------------|------------|--------------|--------|------------|
| Spencer Gulf Praw  | 5     | A            | A           | A          | A          | A          | A            | A      | A          |
| Pabna Sadullaspra  | 2     | A            | B           | B          | B          | A          | A            | B      | B          |
| Beel Chatra        | 2     | A            | B           | B          | B          | A          | A            | A      | B          |
| Kailin Nadi        | 2     | A            | B           | B          | B          | A          | A            | B      | B          |
| Shrimp Artisanal   | 5     | A            | A           | B          | A          | B          | A            | B      | B          |
| Shrimp Industrial  | 5     | A            | A           | B          | A          | B          | A            | B      | B          |
| Industrial Tuna    | 5     | A            | B           | B          | B          | A          | B            | A      | A          |
| Artisanal Sole and | 4     | A            | B           | C          | C          | A          | A            | A      | A          |
| TRY Oysters        | 1     | A            | A           | B          | B          | A          | B            | B      | A          |
| Artisanal          | 3     | A            | B           | B          | B          | C          | B            | B      | C          |
| Artisanal Axim     | 4     | B            | A           | B          | B          | A          | B            | B      | B          |
| Lobster (Nephrops  | 5     | A            | A           | A          | A          | B          | A            | A      | B          |
| Lesser Sunda Artis | 2     | A            | B           | B          | B          | A          | A            | B      | C          |
| Blue Crab          | 5     | A            | A           | B          | B          | B          | A            | B      | B          |
| Longline Tuna      | 1     | A            | B           | B          | B          | A          | A            | B      | A          |
| Suruga Pink Shrim  | 5     | A            | B           | B          | B          | A          | A            | A      | B          |
| Tokyo Bay          | 5     | A            | B           | B          | B          | A          | A            | B      | A          |
| Artisanal Shimoni  | 1     | A            | B           | B          | B          | A          | A            | B      | B          |
| Octopus            | 5     | A            | C           | C          | C          | A          | A            | A      | B          |
| Artisanal Westpoir | 2     | A            | B           | B          | B          | A          | B            | A      | B          |
| Artisanal Robertsp | 2     | A            | C           | C          | C          | B          | B            | B      | B          |
| Semi-Industrial    | 2     | A            | C           | C          | C          | B          | B            | B      | B          |
| Lake Chiuta        | 1     | A            | C           | C          | C          | A          | C            | C      | C          |
| Skipjack Tuna      | 3     | A            | A           | A          | A          | A          | B            | B      | A          |
| La Paz Bivalves    | 4     | A            | A           | A          | A          | A          | A            | A      | A          |
| La Paz Bivalves    | 4     | A            | A           | B          | B          | A          | A            | A      | B          |
| La Paz Bay Chocola | 4     | A            | A           | B          | B          | A          | A            | B      | A          |
| Purse Seine Tuna   | 5     | A            | B           | B          | B          | A          | B            | B      | A          |
| Central Zone       | 5     | A            | A           | B          | C          | C          | C            | C      | A          |
| Southern Zone      | 1     | A            | A           | B          | C          | C          | C            | C      | A          |

| Fishery            | QOHLanding | QOHExCapac | QOHSeasonL | QOHSafety | QOAAsetEai | QOATotReve | QOAAsetVa | QOALoanRat | QOALoanSou |
|--------------------|------------|------------|------------|-----------|------------|------------|-----------|------------|------------|
| Spencer Gulf Praw  | B          | A          | A          | A         | B          | A          | A         | B          | B          |
| Pabna Sadullaspra  | A          | B          | B          | C         | A          | A          | A         |            | A          |
| Beel Chatra        | A          | B          | B          | C         | B          | A          | A         |            | A          |
| Kailin Nadi        | A          | B          | B          | C         | A          | A          | A         |            | A          |
| Shrimp Artisanal   | A          | A          | A          | B         | A          | A          | A         | A          | A          |
| Shrimp Industrial  | A          | A          | A          | B         | A          | A          | A         | A          | A          |
| Industrial Tuna    | A          | A          | B          | A         | A          | C          | A         | A          | B          |
| Artisanal Sole and | C          | B          | A          | C         | A          | B          | A         | B          | B          |
| TRY Oysters        | A          | C          | A          | B         | A          | A          | A         | A          | A          |
| Artisanal          | B          | C          | B          | B         |            |            |           | C          | A          |
| Artisanal Axim     | A          | A          | A          | B         | A          |            | B         | B          | A          |
| Lobster (Nephrops  | A          | B          | A          | A         | B          | B          | B         | B          | B          |
| Lesser Sunda Artis | B          | B          | A          | B         | A          | B          | B         | B          | A          |
| Blue Crab          | B          | A          | B          | B         | B          | B          | A         | B          | A          |
| Longline Tuna      | B          | A          | A          | B         | B          | B          | A         | A          | A          |
| Suruga Pink Shrim  | A          | A          | A          | A         | B          | B          | B         | B          | A          |
| Tokyo Bay          | B          | B          | A          | A         | C          | A          | C         | B          | B          |
| Artisanal Shimoni  | B          | C          | A          | B         | A          | A          | B         |            | B          |
| Octopus            | B          | C          | A          | B         | C          | B          | A         |            | B          |
| Artisanal Westpoir | B          | B          | A          | B         | B          |            |           |            | B          |
| Artisanal Robertsp | C          | C          | A          | B         | C          | B          | B         | B          | B          |
| Semi-Industrial    | C          | C          | A          | B         | C          | B          | B         | B          | B          |
| Lake Chiuta        | C          | C          | C          | C         | C          | C          | C         | C          | C          |
| Skipjack Tuna      | A          | B          | A          | B         | A          | B          | B         | B          | B          |
| La Paz Bivalves    | A          | A          | A          | A         | A          | C          | A         | A          | B          |
| La Paz Bivalves    | A          | A          | A          | A         | A          | C          | A         | A          | A          |
| La Paz Bay Chocola | B          | B          | A          | A         | B          | B          | A         | B          | A          |
| Purse Seine Tuna   | B          | B          | B          | B         | B          | C          | A         | B          | B          |
| Central Zone       | A          | A          | A          | A         | A          | A          | B         | A          | A          |
| Southern Zone      | A          | A          | A          | A         | A          | A          | B         | A          | A          |





| Fishery            | QOOWage | QOEdAcces | QOOHealthA | QOOSocialSt | QOONonresi | QOCEarnings | QOCWage | QOEdAcces | QOCHealthA |
|--------------------|---------|-----------|------------|-------------|------------|-------------|---------|-----------|------------|
| Spencer Gulf Praw  | A       | A         | A          | A           | A          | B           | A       | A         | A          |
| Pabna Sadullaspra  | B       | B         | B          | A           | A          | C           | C       | C         | B          |
| Beel Chatra        | A       | A         | B          | A           | A          | A           | A       | B         | B          |
| Kailin Nadi        | B       | B         | B          | B           | A          |             |         |           |            |
| Shrimp Artisanal   | A       | A         | A          | A           | A          |             |         |           |            |
| Shrimp Industrial  | A       | A         | A          | A           | A          | A           | A       | A         | A          |
| Industrial Tuna    | A       | A         | A          | A           | A          | A           | A       | B         | A          |
| Artisanal Sole and | A       | B         | B          | A           | A          | B           | A       | B         | B          |
| TRY Oysters        | A       | A         | A          | B           | A          | A           | A       | A         | A          |
| Artisanal          | c       | b         | b          | a           | c          | c           | c       | b         | b          |
| Artisanal Axim     | A       | A         | B          | B           | A          | B           | A       | B         | B          |
| Lobster (Nephrops  | B       | A         | A          | A           | A          | A           | A       | A         | A          |
| Lesser Sunda Artis | B       | A         | A          | B           | B          | C           | C       | B         | B          |
| Blue Crab          | B       | A         | A          | A           | A          | B           | B       | A         | A          |
| Longline Tuna      | A       | A         | A          | A           | A          | B           | A       | A         | A          |
| Suruga Pink Shrim  | A       | A         | A          | B           | A          | C           | B       | B         | A          |
| Tokyo Bay          | A       | A         | A          | A           | A          |             | A       | B         | A          |
| Artisanal Shimoni  | B       | A         | A          | B           | B          | B           | B       | B         | B          |
| Octopus            | B       | B         | B          | B           | A          | B           | B       | B         | B          |
| Artisanal Westpoir | A       | A         | B          | B           | A          | A           | B       | A         | A          |
| Artisanal Robertsp | B       | B         | C          | A           | B          | C           | C       | B         | C          |
| Semi-Industrial    | B       | B         | C          | A           | B          | C           | C       | B         | C          |
| Lake Chiuta        | B       | A         | B          | A           | A          | C           | C       | C         | C          |
| Skipjack Tuna      | A       | B         | B          | A           | A          | A           | A       | B         | B          |
| La Paz Bivalves    | C       | B         | B          | A           | A          | C           | C       | B         | A          |
| La Paz Bivalves    | A       | B         | B          | A           | A          | A           | A       | B         | B          |
| La Paz Bay Chocola | B       | B         | B          | A           | A          | B           | B       | A         | A          |
| Purse Seine Tuna   | A       | B         | B          | B           | A          | A           | A       | B         | B          |
| Central Zone       | B       | A         | A          | A           | A          | B           | B       | C         | B          |
| Southern Zone      | B       | A         | A          | A           | A          | B           | B       | C         | B          |

| Fishery            | QOC | SocialSta | QOCNonresis | QOCExperier | QOCAge | QOSPrice | QOSFinalMar | QOSExport | QOSFinalWe | QOSRelative |
|--------------------|-----|-----------|-------------|-------------|--------|----------|-------------|-----------|------------|-------------|
| Spencer Gulf Praw  | B   |           | B           | A           | A      | A        | A           | A         | A          | B           |
| Pabna Sadullaspra  | C   |           | A           | B           | A      | A        | B           | B         | A          | C           |
| Beel Chatra        | C   |           | A           | A           | A      | A        | B           | B         | A          | C           |
| Kailin Nadi        |     |           |             | B           | A      | A        | B           | B         | A          | C           |
| Shrimp Artisanal   |     |           |             | A           | B      | A        | A           | A         | A          | A           |
| Shrimp Industrial  | A   |           | A           | A           | B      | A        | A           | A         | A          | A           |
| Industrial Tuna    | A   |           | A           | B           | A      | A        | A           | A         | A          | B           |
| Artisanal Sole and | B   |           | B           | B           | A      | B        | B           | A         | B          | B           |
| TRY Oysters        | B   |           | A           | A           | B      | B        | A           | A         | A          | A           |
| Artisanal          | c   |           | c           | b           | a      | a        | b           | b         | a          | a           |
| Artisanal Axim     | B   |           | B           | A           | B      | B        | B           | B         | B          | B           |
| Lobster (Nephrops  | A   |           | B           | A           | A      | A        | A           | A         | A          | B           |
| Lesser Sunda Artis | C   |           | C           | C           | C      | B        | B           | B         | B          | A           |
| Blue Crab          | A   |           | A           | A           | A      | B        | A           | A         | A          | A           |
| Longline Tuna      | A   |           | A           | A           | A      | C        | A           | A         | A          | B           |
| Suruga Pink Shrim  | B   |           | A           | B           | B      | A        | A           | A         | B          | C           |
| Tokyo Bay          | A   |           | A           | A           | A      | A        | A           | A         | A          | A           |
| Artisanal Shimoni  | B   |           | B           | C           | C      | B        | B           | C         | B          | C           |
| Octopus            | B   |           | B           | B           | B      | B        | B           | A         | B          | C           |
| Artisanal Westpoir | B   |           | B           | A           | A      |          | A           | B         | B          | A           |
| Artisanal Robertsp | B   |           | B           | A           | A      | C        | B           | C         | C          | B           |
| Semi-Industrial    | B   |           | B           | A           | A      | C        | B           | C         | C          | B           |
| Lake Chiuta        | C   |           | A           | A           | B      | C        | C           | C         | C          | C           |
| Skipjack Tuna      | A   |           | A           | B           | A      | B        | A           | A         | A          | A           |
| La Paz Bivalves    | A   |           | A           | A           | A      | C        | B           | A         | A          | B           |
| La Paz Bivalves    | A   |           | A           | A           | A      | A        | B           | A         | A          | B           |
| La Paz Bay Chocola | A   |           | A           | A           | B      | B        | A           | A         | A          | B           |
| Purse Seine Tuna   | C   |           | A           | B           | B      | B        | A           | A         | A          | A           |
| Central Zone       | B   |           | A           | B           | A      | A        | A           | A         | B          | B           |
| Southern Zone      | B   |           | A           | B           | A      | A        | A           | A         | B          | B           |

| Fishery            | QOSUSEUExp | QOSMargin | QOPYield | QOPShrink | QOPUtilizatic | QOPImprove | QOPSanitatic | QOPSupport | QOBLoanRat |
|--------------------|------------|-----------|----------|-----------|---------------|------------|--------------|------------|------------|
| Spencer Gulf Praw  | A          | A         | B        | A         | A             | A          | A            | A          | B          |
| Pabna Sadullaspra  | A          | A         | A        | B         | C             | A          | C            | C          |            |
| Beel Chatra        | A          | A         | A        | B         | C             | A          | C            | C          |            |
| Kailin Nadi        | A          | A         | A        | B         | C             | A          | C            | C          |            |
| Shrimp Artisanal   | A          | A         | B        | B         | A             | A          | A            | A          | A          |
| Shrimp Industrial  | A          | A         | B        | B         | A             | A          | A            | A          | A          |
| Industrial Tuna    | A          | B         | A        | A         | A             | B          | A            | B          | B          |
| Artisanal Sole and | A          | A         | B        | A         | B             | A          | C            | A          | C          |
| TRY Oysters        | A          |           | C        | B         | A             | A          | B            | A          | B          |
| Artisanal          | b          | b         | A        | A         | A             | A          | B            | B          | C          |
| Artisanal Axim     | B          | B         |          | B         | B             | B          | B            | B          | B          |
| Lobster (Nephrops  | A          | A         | A        | B         | B             | A          | A            | A          | B          |
| Lesser Sunda Artis | B          | A         | B        | A         | A             | A          | C            | C          | C          |
| Blue Crab          | A          | B         | B        | B         | A             | A          | B            | B          | B          |
| Longline Tuna      | A          | B         | B        | B         | B             | A          | B            | A          | B          |
| Suruga Pink Shrim  | C          | B         | A        | A         | B             | A          | A            | B          | B          |
| Tokyo Bay          | A          | A         | A        | A         | A             | A          | A            | A          | B          |
| Artisanal Shimoni  | B          | B         | C        | C         | B             | B          | B            | B          |            |
| Octopus            | B          | C         | C        | C         | C             | C          | C            | C          |            |
| Artisanal Westpoir | B          | A         | A        | A         | B             | B          | B            | A          |            |
| Artisanal Robertsp | B          | B         | B        | B         | B             | B          | A            | B          | B          |
| Semi-Industrial    | B          | B         | B        | B         | B             | B          | A            | B          | B          |
| Lake Chiuta        | C          | B         | C        | B         | B             |            |              | B          | C          |
| Skipjack Tuna      | A          | B         | B        | B         | A             | A          | B            | B          | C          |
| La Paz Bivalves    | A          | C         | B        | C         | C             | A          | B            | A          | B          |
| La Paz Bivalves    | A          | B         | B        | C         | B             | A          | B            | A          | B          |
| La Paz Bay Chocola | A          | A         | B        | B         | A             | B          | A            | A          | B          |
| Purse Seine Tuna   | A          | A         | A        | B         | B             | A          | C            | B          | B          |
| Central Zone       | A          | A         | C        | A         | A             | A          | B            | B          | C          |
| Southern Zone      | A          | A         | C        | A         | A             | A          | B            | B          | C          |

| Fishery            | QOB | LoanSou | QOBCapFunc | QOMEarning | QOMWage | QOMEdAcce | QOMHealth | QOMSocialSt | QOMNonresi | QOWEarning |
|--------------------|-----|---------|------------|------------|---------|-----------|-----------|-------------|------------|------------|
| Spencer Gulf Praw  | B   |         | B          | A          | A       | A         | A         | A           | B          | B          |
| Pabna Sadullaspra  | A   |         | B          | B          | B       | C         | B         | B           | A          | B          |
| Beel Chatra        | A   |         | B          | B          | B       | C         | B         | B           | A          | B          |
| Kailin Nadi        | A   |         | B          | B          | B       | C         | B         | B           | A          | B          |
| Shrimp Artisanal   | A   |         | B          | A          | A       | A         | A         | A           | A          | A          |
| Shrimp Industrial  | A   |         | B          | A          | A       | A         | A         | A           | A          | A          |
| Industrial Tuna    | B   |         | A          | A          | A       | A         | A         | A           | A          | A          |
| Artisanal Sole and | A   |         | B          | A          | B       | B         | B         | B           | B          | B          |
| TRY Oysters        | B   |         | A          | A          | A       | A         | A         | B           | A          | A          |
| Artisanal          | B   |         | C          | C          | C       | B         | B         | A           | A          | C          |
| Artisanal Axim     | B   |         | B          | A          | B       | B         | B         | B           | A          | B          |
| Lobster (Nephrops  | A   |         | A          |            | A       | A         | A         | A           | A          | A          |
| Lesser Sunda Artis | B   |         | C          | C          | C       | C         | C         | C           | C          | C          |
| Blue Crab          | A   |         | A          | B          | B       | A         | A         | A           | A          | B          |
| Longline Tuna      | B   |         | B          | B          | B       | A         | A         | A           | B          | A          |
| Suruga Pink Shrim  | B   |         | B          | C          | C       | B         | A         | A           | A          | C          |
| Tokyo Bay          | B   |         | B          |            | A       | A         | A         | A           | B          |            |
| Artisanal Shimoni  | B   |         | B          | B          | B       | B         | B         | B           | B          | C          |
| Octopus            | C   |         | C          | B          | B       | B         | B         | C           | C          | C          |
| Artisanal Westpoir | A   |         | A          | B          | B       | B         | B         | B           | B          | B          |
| Artisanal Robertsp | B   |         | B          | B          | B       | B         | B         | C           | B          | B          |
| Semi-Industrial    | B   |         | B          | B          | B       | B         | B         | C           | B          | B          |
| Lake Chiuta        | C   |         | C          | B          | B       | B         | B         | C           | C          | B          |
| Skipjack Tuna      | A   |         | B          | A          | A       | B         | B         | A           | B          | B          |
| La Paz Bivalves    | B   |         | B          | C          | C       | C         | C         | C           | A          | C          |
| La Paz Bivalves    | B   |         | B          | B          | B       | C         | C         | C           | A          | C          |
| La Paz Bay Chocola | A   |         | B          | A          | B       | A         | A         | A           | A          | A          |
| Purse Seine Tuna   | B   |         | B          | A          | A       | B         | B         | C           | B          | A          |
| Central Zone       | C   |         | B          | A          | A       | A         | A         | A           | A          | B          |
| Southern Zone      | C   |         | B          | A          | A       | A         | A         | A           | A          | B          |

| Fishery            | QOWWage | QOWSocialSt | QOWEdAcce | QOWHealthA | QOWNonres | QOWExperie | QI_EPI | QIEDisease | QIEDisasters |
|--------------------|---------|-------------|-----------|------------|-----------|------------|--------|------------|--------------|
| Spencer Gulf Praw  | B       | A           | A         | A          | B         | B          | A      |            |              |
| Pabna Sadullaspra  | B       | B           | C         | B          | A         | C          | A      | A          | B            |
| Beel Chatra        | B       | B           | C         | B          | A         | C          | A      | A          | A            |
| Kailin Nadi        | B       | B           | C         | B          | A         | C          | A      | A          | A            |
| Shrimp Artisanal   | A       | A           | A         | A          | A         | A          | A      | A          | A            |
| Shrimp Industrial  | A       | A           | A         | A          | A         | A          | A      | A          | A            |
| Industrial Tuna    | A       | A           | B         | A          | A         | A          | A      | A          | A            |
| Artisanal Sole and | B       | B           | A         | B          | A         | B          | A      | A          | A            |
| TRY Oysters        | A       | A           | A         | B          | A         | B          | A      | A          | A            |
| Artisanal          | C       | A           | A         | B          | B         | A          | A      | B          | A            |
| Artisanal Axim     | B       | B           | B         | B          | A         | B          | A      | B          | A            |
| Lobster (Nephrops  | A       | A           | C         | B          | B         | A          | A      | B          | B            |
| Lesser Sunda Artis | C       | C           | C         | C          | C         | C          | A      | A          | A            |
| Blue Crab          | B       | A           | A         | A          | A         | A          | A      | A          | B            |
| Longline Tuna      | A       | A           | B         | B          | A         | B          | A      | A          | B            |
| Suruga Pink Shrim  | C       | B           | B         | A          | B         | B          | A      | A          | B            |
| Tokyo Bay          | A       | A           | A         | A          | B         |            | A      | B          | A            |
| Artisanal Shimoni  | C       | A           | A         | A          | A         | B          | B      | A          | A            |
| Octopus            | C       | C           | C         | C          | B         | C          | B      | A          | A            |
| Artisanal Westpoir | B       | B           | B         | B          | B         | B          | A      | A          | A            |
| Artisanal Robertsp | B       | B           | B         | C          | C         | B          | B      | B          | B            |
| Semi-Industrial    | B       | B           | B         | C          | C         | B          | B      | B          | B            |
| Lake Chiuta        | C       | B           | B         | B          | A         | A          | A      | A          | A            |
| Skipjack Tuna      | B       | B           | B         | B          | A         | B          | B      | A          | B            |
| La Paz Bivalves    | C       | C           | C         | C          | A         | C          | A      | B          | B            |
| La Paz Bivalves    | C       | C           | C         | C          | A         | C          | A      | B          | B            |
| La Paz Bay Chocola | A       | B           | B         | B          | A         | A          | A      | B          | B            |
| Purse Seine Tuna   | A       | A           | B         | B          | A         | B          | A      | A          | A            |
| Central Zone       | B       | B           | B         | B          | A         | A          | A      | A          | A            |
| Southern Zone      | B       | B           | B         | B          | A         | A          | A      | A          | A            |



| Fishery                | QIA | Security | QIADurability | QIAFlexibility | QIAExclusivity | QIHProportion | QIHTransfer | QIHSecurity | QIHDurability | QIHFlexibility |
|------------------------|-----|----------|---------------|----------------|----------------|---------------|-------------|-------------|---------------|----------------|
| Spencer Gulf Prawns    |     |          |               |                | A              | A             |             |             |               |                |
| Pabna Sadullasprawn    | B   | A        | B             | B              | B              |               |             |             |               | A              |
| Beel Chatra            | B   | A        | B             | A              | A              |               |             |             |               | A              |
| Kailin Nadi            | B   | A        | B             | A              | B              |               |             |             |               | A              |
| Shrimp Artisanal       | A   | A        | A             | A              | A              |               |             |             |               |                |
| Shrimp Industrial      | A   | A        | A             | A              | A              |               |             |             |               |                |
| Industrial Tuna        | B   | A        | A             | B              | A              |               |             |             |               |                |
| Artisanal Sole and     | B   | A        | B             | B              | A              |               |             |             |               |                |
| TRY Oysters            | A   | B        | B             | B              | B              | A             | B           | B           | B             | B              |
| Artisanal              | A   | A        | A             | A              | A              | A             | A           | A           | A             | A              |
| Artisanal Axim         | B   | B        | B             | B              | B              | C             | B           | A           | A             | A              |
| Lobster (Nephrops)     | A   | A        | A             | A              | A              | B             | A           | A           | A             | A              |
| Lesser Sunda Artisanal | B   | B        | B             | B              | C              | B             | B           | B           | B             | B              |
| Blue Crab              | B   | B        | B             | B              | A              |               |             |             |               |                |
| Longline Tuna          | A   | A        | A             | A              | A              |               |             |             |               |                |
| Suruga Pink Shrimp     | A   | A        | A             | A              | A              | A             | A           | A           | A             | A              |
| Tokyo Bay              | A   | B        | B             | B              | A              |               |             |             |               |                |
| Artisanal Shimoni      | A   | A        | A             | A              | A              | A             | A           | A           | A             | A              |
| Octopus                | A   | A        | A             | A              | A              | A             | B           | B           | B             | B              |
| Artisanal Westport     | A   | A        | A             | A              | A              | A             | A           | A           | A             | A              |
| Artisanal Robertson    | B   | B        | B             | B              | A              |               |             |             |               |                |
| Semi-Industrial        | B   | B        | B             | B              | A              |               |             |             |               |                |
| Lake Chiuta            | B   | A        | C             | B              | A              |               |             |             |               | C              |
| Skipjack Tuna          | A   | A        | A             | A              | A              |               |             |             |               |                |
| La Paz Bivalves        | A   | A        | A             | A              |                | A             | A           | A           | A             | A              |
| La Paz Bivalves        | B   | A        | B             | B              | B              | B             | B           | A           | B             | B              |
| La Paz Bay Chocolate   | A   | A        | B             | B              | A              | A             | B           | A           | A             | A              |
| Purse Seine Tuna       | B   | B        | B             | B              | A              | C             | B           | C           | C             | B              |
| Central Zone           | A   | A        | B             | A              | A              |               |             |             |               |                |
| Southern Zone          | A   | A        | B             | A              | A              | A             | A           | A           | A             | A              |



| Fishery            | QI | Exclusivit | QIOParticipa | QIOMgmtInf | QIOBusInflue | QIPDays | QIPFinancial | QICLeadersh | QICCohesion | QIWBusInflu |
|--------------------|----|------------|--------------|------------|--------------|---------|--------------|-------------|-------------|-------------|
| Spencer Gulf Praw  |    |            |              |            |              |         |              |             |             |             |
| Pabna Sadullaspra  | B  |            | A            | A          | A            | A       | A            | B           | A           | A           |
| Beel Chatra        | A  |            | B            | A          | A            | A       | A            | A           | A           | A           |
| Kailin Nadi        | A  |            | A            | A          | A            | A       | A            | A           | A           | A           |
| Shrimp Artisanal   |    |            | A            | A          | A            | B       | A            | B           | A           | A           |
| Shrimp Industrial  |    |            | A            | A          | A            | B       | A            | B           | A           | A           |
| Industrial Tuna    |    |            | B            | B          | B            | C       | A            | B           | A           | A           |
| Artisanal Sole and |    |            | A            | B          | B            | A       | A            | B           | B           | B           |
| TRY Oysters        | A  |            | A            | B          | B            | A       | A            | A           | A           | A           |
| Artisanal          | A  |            | A            | A          | B            | C       | B            | B           | B           | B           |
| Artisanal Axim     | B  |            | A            | A          | A            | B       | A            | A           | A           | B           |
| Lobster (Nephrops  | A  |            | A            | A          | A            | A       | A            | C           | B           | B           |
| Lesser Sunda Artis | B  |            | B            | B          | B            | B       | B            | B           | B           | B           |
| Blue Crab          |    |            | B            | B          | B            | B       | B            | C           | C           | C           |
| Longline Tuna      |    |            | B            | B          | B            | B       | B            | B           | A           | A           |
| Suruga Pink Shrim  | A  |            | A            | A          | A            | A       | B            | A           | A           | A           |
| Tokyo Bay          |    |            | A            | B          | B            | A       | B            | B           | A           | A           |
| Artisanal Shimoni  | A  |            | A            | A          | A            | B       | B            | A           | A           | A           |
| Octopus            | B  |            | A            | A          | A            | B       | B            | B           | A           | A           |
| Artisanal Westpoir | A  |            | B            | A          | A            | A       | A            | A           | A           | A           |
| Artisanal Robertsp |    |            | A            | B          | B            | B       | B            | A           | A           | A           |
| Semi-Industrial    |    |            | A            | B          | B            | B       | B            | A           | A           | A           |
| Lake Chiuta        | B  |            | B            | B          | B            | B       | A            | C           | A           | A           |
| Skipjack Tuna      |    |            | B            | B          | B            | B       | C            | B           | A           | A           |
| La Paz Bivalves    | A  |            | A            | A          | A            | A       | A            | A           | A           | B           |
| La Paz Bivalves    | B  |            | A            | A          | A            | A       | B            | A           | A           | B           |
| La Paz Bay Chocola | B  |            | B            | B          | B            | A       | B            | B           | A           | B           |
| Purse Seine Tuna   | B  |            |              |            |              |         | A            |             |             | A           |
| Central Zone       |    |            | A            | B          | B            | A       | A            | A           | B           |             |
| Southern Zone      | A  |            | A            | B          | B            | A       | A            | A           | B           |             |

| Fishery            | QIWMgmtInf | QIWHarvest | QIWPostHar | QIMExpendit | QIMEnforcer | QIMJurisdicti | QIMSubsidie | QIDAvailabili | QIDAnalysis |
|--------------------|------------|------------|------------|-------------|-------------|---------------|-------------|---------------|-------------|
| Spencer Gulf Praw  |            |            |            |             |             |               |             |               |             |
| Pabna Sadullaspra  | A          | A          | A          | C           | A           | B             | A           | A             | B           |
| Beel Chatra        | A          | A          | A          | B           | B           | B             | A           | A             | B           |
| Kailin Nadi        | A          | A          | A          | B           | A           | B             | A           | A             | B           |
| Shrimp Artisanal   | A          | A          | A          | A           | A           | A             | A           | A             | A           |
| Shrimp Industrial  | A          | A          | A          | A           | A           | A             | A           | A             | A           |
| Industrial Tuna    | A          | A          | B          | B           | B           | A             | B           | B             | B           |
| Artisanal Sole and | B          | B          | C          | B           | A           | A             | A           | B             | B           |
| TRY Oysters        | A          | A          | A          | A           | B           | A             | A           | A             | A           |
| Artisanal          | B          | B          | C          | C           | B           | C             | B           | B             | B           |
| Artisanal Axim     | A          | A          | A          |             | B           | B             | A           | A             | B           |
| Lobster (Nephrops  | B          | B          | C          | B           | B           | B             | B           | A             | B           |
| Lesser Sunda Artis | B          | A          | B          | B           | A           | B             | C           | A             | B           |
| Blue Crab          | C          | C          | C          | B           | C           | C             | B           | A             | A           |
| Longline Tuna      | B          | A          | A          | A           | A           | A             | B           | B             | A           |
| Suruga Pink Shrim  | A          | B          | B          | B           | A           | A             | B           | A             | B           |
| Tokyo Bay          | A          | A          | B          |             | A           | B             | B           | B             | B           |
| Artisanal Shimoni  | A          | A          | A          | B           | A           | A             | A           | A             | A           |
| Octopus            | A          | A          | B          | B           | A           | B             | A           | B             | A           |
| Artisanal Westpoir | A          | A          | A          | A           | A           | A             | A           | A             | A           |
| Artisanal Robertsp | A          | B          | B          | C           | B           | B             | A           | A             | A           |
| Semi-Industrial    | A          | B          | B          | C           | B           | B             | A           | A             | A           |
| Lake Chiuta        | A          | A          | A          | A           | A           | A             | A           | A             | C           |
| Skipjack Tuna      | A          | A          | A          | B           | A           | A             | B           | B             | B           |
| La Paz Bivalves    | A          | A          | A          | C           | A           | A             | A           | A             | A           |
| La Paz Bivalves    | A          | A          | A          | A           | B           | A             | A           | A             | A           |
| La Paz Bay Chocola | B          | A          | A          | B           | B           | A             | A           | B             | B           |
| Purse Seine Tuna   | A          | A          | A          | B           | A           | B             |             | C             | B           |
| Central Zone       |            |            |            | A           | B           | A             | B           | A             | A           |
| Southern Zone      |            |            |            | A           | B           | A             | B           | A             | A           |

| Fishery            | QILMPAs | QILSpatial | QILTACs | QITPricing | QITPriceAvai | QITBuyers | QITVerticalIn | QITTariffs | QITNonTariff |
|--------------------|---------|------------|---------|------------|--------------|-----------|---------------|------------|--------------|
| Spencer Gulf Praw  |         |            |         |            |              |           |               |            |              |
| Pabna Sadullaspra  | A       | A          | A       | A          | B            | A         | A             |            | B            |
| Beel Chatra        | A       | A          | A       | A          | B            | A         | A             |            | B            |
| Kailin Nadi        | A       | A          | A       | A          | B            | A         | A             | B          | B            |
| Shrimp Artisanal   | A       | A          | A       | A          | A            | A         | A             | A          | A            |
| Shrimp Industrial  | A       | A          | A       | A          | A            | A         | A             | A          | A            |
| Industrial Tuna    | A       | A          | A       | B          | B            | B         | A             | B          | A            |
| Artisanal Sole and | A       | A          | A       | A          | A            | A         | A             | B          | B            |
| TRY Oysters        | A       | A          | A       | A          | A            | A         | A             | A          | A            |
| Artisanal          | A       | A          | B       | B          | C            | A         | A             | B          | B            |
| Artisanal Axim     | A       | A          | A       | A          | B            | B         | C             | B          | A            |
| Lobster (Nephrops  | C       | C          | B       | B          | A            | B         | A             | A          | A            |
| Lesser Sunda Artis | B       | B          | A       | A          | A            | A         | B             | B          | B            |
| Blue Crab          | B       | B          | B       | B          | B            | A         | A             | A          | A            |
| Longline Tuna      | A       | A          | A       | A          | A            | B         | A             | A          | B            |
| Suruga Pink Shrim  | A       | A          | A       | A          | B            | A         | A             | B          | B            |
| Tokyo Bay          | C       | B          | B       | A          | B            | A         | A             | A          | A            |
| Artisanal Shimoni  | A       |            | A       | B          | B            | B         | A             | B          | C            |
| Octopus            | A       | A          | A       | A          | B            | A         | A             |            |              |
| Artisanal Westpoir | A       | A          | A       | A          | A            | A         | A             | A          | A            |
| Artisanal Robertsp | A       | A          | A       | B          | B            | B         | B             | B          | B            |
| Semi-Industrial    | A       | A          | A       | B          | B            | B         | B             | B          | B            |
| Lake Chiuta        | A       | B          | C       | B          | B            | B         | B             | C          | C            |
| Skipjack Tuna      | A       | B          | A       | A          | B            | A         | A             | B          | B            |
| La Paz Bivalves    | A       | A          | A       | A          | A            | A         | A             | C          | C            |
| La Paz Bivalves    | A       | B          | A       | A          | A            | A         | A             | C          | C            |
| La Paz Bay Chocola | B       | B          | B       | B          | B            | A         | A             | C          | C            |
| Purse Seine Tuna   | B       | C          | A       |            |              |           |               | B          | B            |
| Central Zone       | A       | B          | B       | B          | B            | A         | A             | B          | B            |
| Southern Zone      | A       | B          | B       | B          | B            | A         | A             | B          | B            |

| Fishery                | QIIShipping | QIIRoads | QIITechnology | QIIExtension | QIIElectricity | QIIIce |
|------------------------|-------------|----------|---------------|--------------|----------------|--------|
| Spencer Gulf Prawns    |             |          |               |              |                |        |
| Pabna Sadullasprab     | B           | A        | A             | A            | A              | A      |
| Beel Chatra            | B           | A        | A             | A            | A              | A      |
| Kailin Nadi            | B           | A        | A             | A            | A              | A      |
| Shrimp Artisanal       | A           | A        | A             | A            | A              | A      |
| Shrimp Industrial      | A           | A        | A             | A            | A              | A      |
| Industrial Tuna        | A           | B        | B             | A            | A              | A      |
| Artisanal Sole and     | B           | A        | A             | A            | A              | A      |
| TRY Oysters            | B           | A        | A             | A            | B              | B      |
| Artisanal              | B           | B        | B             | A            | B              | A      |
| Artisanal Axim         | B           |          | C             | B            | C              | B      |
| Lobster (Nephrops)     | A           | A        | A             | A            | A              | A      |
| Lesser Sunda Artisanal | B           | A        | A             | A            | A              | B      |
| Blue Crab              | B           | A        | A             | A            | B              | B      |
| Longline Tuna          | A           | A        | A             | A            | A              | A      |
| Suruga Pink Shrimp     | B           | A        | A             | A            | A              | A      |
| Tokyo Bay              | A           | A        | A             | B            | A              | A      |
| Artisanal Shimoni      | B           | A        | A             | A            | B              | B      |
| Octopus                | B           | A        | A             | B            | B              | A      |
| Artisanal Westpoir     | B           | A        | A             | A            | A              | A      |
| Artisanal Robertsp     | B           | B        | B             | A            | A              | A      |
| Semi-Industrial        | B           | B        | B             | A            | A              | A      |
| Lake Chiuta            | B           | B        | B             | A            | B              | B      |
| Skipjack Tuna          | B           |          | A             | B            | B              | A      |
| La Paz Bivalves        | B           | B        | A             | A            | A              | A      |
| La Paz Bivalves        | B           | B        | A             | A            | A              | A      |
| La Paz Bay Chocolate   | B           | A        | A             | B            | A              | A      |
| Purse Seine Tuna       | B           |          | B             | A            | B              | A      |
| Central Zone           | B           | A        | B             | B            | B              | B      |
| Southern Zone          | B           | A        | B             | B            | B              | B      |

|                      |              |     |      |            |        |   |   |   |   |
|----------------------|--------------|-----|------|------------|--------|---|---|---|---|
| Hoki                 | New Zealand  | 1.1 | 2011 | Finfish    | Single | 5 | 4 | 4 | 4 |
| Cod                  | Norway       | 1.1 | 2010 | Finfish    | Multi  | 5 | 5 | 5 | 5 |
| Purse Seiners        | Norway       | 1.1 | 2010 | Finfish    | Multi  | 5 | 5 | 5 | 5 |
| Anchovy              | Peru         | 1.1 | 2011 | Finfish    | Single | 1 | 3 | 2 | 3 |
| Blue Crab            | Phillippines | 1.1 | 2010 | Crustacean | Single | 1 | 3 | 2 | 5 |
| Artisanal            | Senegal      | 1.1 | 2010 | Finfish    | Multi  | 1 | 1 | 1 | 5 |
| Artisanal Ngaparou   | Senegal      | 1.1 | 2013 | Finfish    | Multi  | 3 | 3 | 2 | 3 |
| Inshore Artisanal    | Seychelles   | 1.1 | 2011 | Finfish    | Multi  | 3 | 3 | 4 | 5 |
| Semi-Industrial      | Seychelles   | 1.1 | 2011 | Finfish    | Multi  | 4 | 3 | 4 | 5 |
| Sea Cucumber         | Seychelles   | 1.1 | 2011 | Other      | Single | 2 | 2 | 2 | 5 |
| IO Purse Seine Tun   | EU           | 1.2 | 2013 | Finfish    | Multi  | 5 | 5 | 5 | 5 |
| Sherbro              | Sierra Leone | 1.1 | 2013 | Finfish    | Multi  | 3 | 2 | 1 | 5 |
| Tombo                | Sierra Leone | 1.1 | 2013 | Finfish    | Multi  | 3 | 2 | 1 | 5 |
| Baltic Cod           | Sweden       | 1.1 | 2010 | Finfish    | Single | 5 | 5 | 5 | 3 |
| Longline Tuna        | Taiwan       | 1.2 | 2013 | Finfish    | Multi  | 3 | 3 | 3 | 5 |
| Lake Victoria Daga   | Uganda       | 1.1 | 2010 | Finfish    | Single | 5 | 5 | 5 | 5 |
| Lake Victoria Tilapi | Uganda       | 1.1 | 2010 | Finfish    | Single | 5 | 5 | 5 | 5 |
| Nile Perch           | Uganda       | 1.1 | 2010 | Finfish    | Multi  | 1 | 3 | 2 | 5 |
| AK Pollock           | US           | 1.1 | 2013 | Finfish    | Single | 5 | 5 | 5 | 5 |
| FL Spiny Lobster     | US           | 1.1 | 2010 | Crustacean | Single | 5 | 5 | 5 | 3 |
| Louisiana Shrimp     | US           | 1.1 | 2010 | Crustacean | Single | 5 | 4 | 4 | 5 |
| AK Salmon            | US           | 1.1 | 2009 | Finfish    | Single | 5 | 5 | 5 | 4 |
| NE Groundfish        | US           | 1.1 | 2008 | Finfish    | Multi  | 2 | 3 | 2 | 3 |
| CA Urchin            | US           | 1.1 | 2010 | Other      | Single | 3 | 3 | 3 | 5 |
| OR Dungeness Crab    | US           | 1.1 | 2010 | Crustacean | Single | 5 | 5 | 5 | 4 |
| AK Crab              | US           | 1.1 | 2011 | Crustacean | Single | 5 | 5 | 5 | 3 |
| AK Halibut           | US           | 1.1 | 2011 | Finfish    | Single | 5 | 5 | 5 | 5 |
| Pacific Groundfish   | US           | 1.1 | 2011 | Finfish    | Multi  | 4 | 4 | 5 | 4 |
| Thanh Hoa            | Vietnam      | 1.1 | 2011 | Finfish    | Single | 1 | 1 | 1 | 5 |
| Southern Zone Rock   | Australia    | 1.1 | 2012 | Crustacean | Single | 4 | 4 | 5 | 5 |
| Western Zone Abalone | Australia    | 1.1 | 2011 | Shellfish  | Single | 4 | 5 | 5 | 5 |

|                      |   |   |   |   |   |   |   |   |   |
|----------------------|---|---|---|---|---|---|---|---|---|
| Hoki                 | 4 | 5 | 4 | 5 | 3 | 5 | 5 | 5 | 5 |
| Cod                  | 5 | 4 | 5 | 4 | 4 | 4 | 4 | 5 | 4 |
| Purse Seiners        | 5 | 4 | 5 | 4 | 4 | 4 | 5 | 5 | 5 |
| Anchovy              | 4 | 4 | 4 | 3 | 4 | 2 | 4 | 1 | 3 |
| Blue Crab            | 2 | 4 | 3 | 1 | 1 | 2 | 5 | 5 | 1 |
| Artisanal            | 5 | 3 | 3 | 1 | 2 | 1 | 4 | 1 | 1 |
| Artisanal Ngaparou   | 4 | 2 | 3 | 1 | 1 | 1 | 4 | 3 | 2 |
| Inshore Artisanal    | 5 | 4 | 4 | 1 | 4 | 2 | 5 | 5 | 1 |
| Semi-Industrial      | 3 | 3 | 5 | 1 | 4 | 5 | 4 | 5 | 1 |
| Sea Cucumber         | 5 | 3 | 4 | 1 | 1 | 2 | 2 | 4 | 1 |
| IO Purse Seine Tun   | 3 | 3 | 5 | 1 | 4 | 3 | 4 | 5 | 1 |
| Sherbro              | 3 | 2 | 4 | 1 | 4 | 5 | 5 | 2 | 1 |
| Tombo                | 3 | 2 | 3 | 1 | 1 | 3 | 3 | 5 | 1 |
| Baltic Cod           | 4 | 5 | 4 | 1 | 3 | 3 | 3 | 5 | 1 |
| Longline Tuna        | 4 | 1 | 5 | 1 | 4 | 2 | 5 | 3 | 1 |
| Lake Victoria Daga   | 4 | 5 | 4 | 1 | 5 | 2 | 5 |   | 1 |
| Lake Victoria Tilapi | 4 | 5 | 4 | 1 | 2 | 3 | 5 | 1 | 1 |
| Nile Perch           | 4 | 2 | 4 | 1 | 2 | 1 | 5 | 2 | 1 |
| AK Pollock           | 4 | 5 | 5 | 5 | 5 | 5 | 5 | 4 | 4 |
| FL Spiny Lobster     | 5 | 3 | 3 | 1 | 5 | 5 | 3 | 5 | 2 |
| Louisiana Shrimp     | 1 | 4 | 4 | 1 | 4 | 2 | 4 | 5 | 2 |
| AK Salmon            | 5 | 5 | 5 | 5 | 4 | 1 | 3 | 5 | 2 |
| NE Groundfish        | 2 | 3 | 4 | 1 | 2 | 2 | 2 | 2 | 1 |
| CA Urchin            | 5 | 4 | 4 | 1 | 3 | 4 | 4 | 4 | 2 |
| OR Dungeness Crab    | 5 | 5 | 5 | 3 | 4 | 3 | 2 | 3 | 3 |
| AK Crab              | 5 | 5 | 5 | 1 | 4 | 5 | 5 | 4 | 5 |
| AK Halibut           | 4 | 5 | 5 | 5 | 4 | 4 | 4 | 4 | 5 |
| Pacific Groundfish   | 3 | 5 | 4 | 1 | 3 | 2 | 5 | 2 | 2 |
| Thanh Hoa            | 2 | 3 | 3 | 1 | 1 | 3 | 5 | 2 | 2 |
| Southern Zone Roc    | 5 | 3 | 5 | 1 | 3 | 2 | 3 | 5 | 4 |
| Western Zone Aba     | 5 | 3 | 5 | 1 | 3 | 2 | 5 | 4 | 4 |

|                      |   |   |   |   |   |   |   |   |   |
|----------------------|---|---|---|---|---|---|---|---|---|
| Hoki                 | 4 | 4 | 4 | 4 | 4 | 4 | 4 | 4 | 4 |
| Cod                  | 5 | 5 | 3 | 3 | 4 | 3 | 4 | 4 | 5 |
| Purse Seiners        | 4 | 5 | 3 | 3 | 4 | 3 | 4 | 3 | 4 |
| Anchovy              | 5 | 5 | 3 | 3 | 4 | 3 | 3 | 1 | 2 |
| Blue Crab            | 2 | 5 | 5 | 2 | 4 | 3 | 5 | 5 | 5 |
| Artisanal            | 4 | 5 | 2 | 2 | 4 | 4 | 4 | 3 | 4 |
| Artisanal Ngaparou   | 5 | 4 | 1 | 2 | 3 | 2 | 2 | 2 | 2 |
| Inshore Artisanal    | 5 | 5 | 4 | 3 | 2 | 2 | 4 | 3 | 2 |
| Semi-Industrial      | 4 | 5 | 4 | 3 | 4 | 4 | 4 | 2 | 4 |
| Sea Cucumber         | 5 | 5 | 4 | 3 | 2 | 3 | 2 | 3 | 3 |
| IO Purse Seine Tun   | 2 | 3 | 5 | 5 | 5 | 3 | 4 | 3 | 4 |
| Sherbro              | 5 | 5 | 2 | 2 | 1 | 2 | 2 | 3 | 4 |
| Tombo                | 3 | 5 | 1 | 2 | 3 | 2 | 2 | 3 | 4 |
| Baltic Cod           | 5 | 4 | 4 | 4 | 4 | 4 | 4 | 4 | 4 |
| Longline Tuna        | 5 | 2 | 5 | 5 | 4 | 4 | 5 | 3 | 2 |
| Lake Victoria Daga   | 5 | 5 | 2 | 2 | 3 | 3 | 3 | 4 | 3 |
| Lake Victoria Tilapi | 2 | 5 | 2 | 2 | 3 | 5 | 5 | 4 |   |
| Nile Perch           | 5 | 5 | 1 | 2 | 3 | 3 | 4 | 4 | 3 |
| AK Pollock           | 4 | 4 | 5 | 4 | 4 | 4 | 4 | 4 | 4 |
| FL Spiny Lobster     | 3 | 2 | 3 | 2 | 3 | 3 | 3 | 2 | 2 |
| Louisiana Shrimp     | 1 | 4 | 4 | 3 | 3 | 4 | 4 | 2 | 3 |
| AK Salmon            | 3 | 1 | 4 | 3 | 4 | 2 | 3 | 1 | 2 |
| NE Groundfish        | 1 | 3 | 3 | 3 | 2 | 4 | 4 | 3 | 4 |
| CA Urchin            | 4 | 5 | 4 | 3 | 4 | 4 | 5 | 4 | 4 |
| OR Dungeness Cral    | 3 | 3 | 4 | 3 | 3 | 3 | 3 | 1 | 4 |
| AK Crab              | 4 | 4 | 4 | 3 | 4 | 5 | 5 | 4 | 4 |
| AK Halibut           | 5 | 5 | 4 | 4 | 4 | 4 | 5 | 3 | 3 |
| Pacific Groundfish   | 3 | 5 | 4 | 4 | 4 | 4 | 5 | 3 | 5 |
| Thanh Hoa            | 4 | 2 | 2 | 2 | 4 | 3 | 3 | 3 | 3 |
| Southern Zone Roc    | 3 | 3 | 4 | 4 | 4 | 5 | 5 | 4 | 4 |
| Western Zone Aba     | 3 | 3 | 4 | 4 | 4 | 5 | 5 | 5 | 5 |





|                      |   |   |   |   |   |   |   |   |   |
|----------------------|---|---|---|---|---|---|---|---|---|
| Hoki                 | 3 | 3 | 5 | 5 | 3 | 3 | 4 | 2 | 4 |
| Cod                  | 5 | 5 | 5 | 5 | 2 | 4 | 4 | 4 | 4 |
| Purse Seiners        | 5 | 5 | 5 | 5 | 2 | 4 | 4 | 4 | 4 |
| Anchovy              | 5 | 5 | 3 | 4 | 3 | 4 | 4 | 4 | 5 |
| Blue Crab            | 2 | 2 | 2 | 2 | 2 | 5 | 4 | 5 | 4 |
| Artisanal            | 3 | 3 | 2 | 3 | 2 | 3 | 5 | 5 | 4 |
| Artisanal Ngaparou   | 4 | 4 | 2 | 3 | 3 | 4 | 5 | 2 | 3 |
| Inshore Artisanal    | 4 | 4 | 5 | 5 | 2 | 5 | 4 | 3 | 5 |
| Semi-Industrial      | 5 | 5 | 5 | 5 | 2 | 4 | 4 | 3 | 5 |
| Sea Cucumber         | 5 | 5 | 5 | 5 | 2 | 4 | 3 | 3 | 5 |
| IO Purse Seine Tun   | 5 | 5 | 4 | 3 | 5 | 2 | 5 | 5 | 5 |
| Sherbro              | 2 | 5 | 3 | 3 | 2 | 4 | 5 | 4 | 5 |
| Tombo                | 3 | 3 | 3 | 4 | 3 | 3 | 5 | 5 | 5 |
| Baltic Cod           | 3 | 3 | 5 | 5 | 2 | 4 | 4 | 2 | 4 |
| Longline Tuna        | 4 | 4 | 3 | 3 | 3 | 2 | 4 | 3 | 4 |
| Lake Victoria Daga   | 3 | 3 | 2 | 1 | 2 | 5 | 3 | 2 | 5 |
| Lake Victoria Tilapi | 3 | 3 | 2 | 2 | 2 | 3 | 4 | 3 | 5 |
| Nile Perch           | 4 | 4 | 2 | 1 | 2 | 5 | 3 | 1 | 5 |
| AK Pollock           | 4 | 5 | 5 | 5 | 3 | 2 | 5 | 4 | 5 |
| FL Spiny Lobster     | 3 | 3 | 5 | 5 | 2 | 4 | 4 | 3 | 4 |
| Louisiana Shrimp     | 4 | 4 | 5 | 4 | 3 | 4 | 5 | 2 | 3 |
| AK Salmon            | 2 | 3 | 5 | 5 | 3 | 3 | 2 | 5 | 2 |
| NE Groundfish        | 3 | 3 | 5 | 5 | 2 | 4 | 3 | 3 | 5 |
| CA Urchin            | 1 | 1 | 4 | 4 | 2 | 4 | 5 | 2 | 4 |
| OR Dungeness Cral    | 3 | 3 | 5 | 5 | 3 | 3 | 4 | 4 | 3 |
| AK Crab              | 4 | 4 | 5 | 5 | 3 | 3 | 4 | 3 | 4 |
| AK Halibut           | 3 | 4 | 4 | 5 | 2 | 3 | 4 | 4 | 4 |
| Pacific Groundfish   | 3 | 4 | 5 | 5 | 3 | 3 | 4 | 5 | 5 |
| Thanh Hoa            | 2 | 2 | 2 | 3 | 2 | 5 | 4 | 2 | 5 |
| Southern Zone Roc    | 4 | 4 | 5 | 5 | 4 | 5 | 4 | 5 | 4 |
| Western Zone Aba     | 4 | 4 | 5 | 5 | 4 | 5 | 4 | 5 | 4 |

|                      |   |   |   |   |   |   |   |   |   |
|----------------------|---|---|---|---|---|---|---|---|---|
| Hoki                 | 4 | 5 | 5 | 4 | 5 | 4 | 4 | 4 | 4 |
| Cod                  | 3 | 5 | 5 | 3 | 5 | 4 | 4 | 4 | 3 |
| Purse Seiners        | 3 | 5 | 5 | 3 | 5 | 4 | 4 | 4 | 3 |
| Anchovy              | 1 | 5 | 3 | 5 | 5 | 5 | 5 | 3 | 3 |
| Blue Crab            | 3 | 3 | 5 | 2 | 4 | 4 | 2 | 4 | 3 |
| Artisanal            | 5 | 4 | 4 | 4 | 5 | 5 | 5 | 3 | 2 |
| Artisanal Ngaparou   | 4 | 4 | 1 | 2 | 4 | 2 | 1 | 5 | 4 |
| Inshore Artisanal    | 3 | 2 | 2 | 3 | 2 | 5 | 4 | 5 | 4 |
| Semi-Industrial      | 4 | 4 | 5 | 2 | 5 | 4 | 5 | 3 | 4 |
| Sea Cucumber         | 5 | 5 | 5 | 3 | 4 | 3 | 5 | 4 | 4 |
| IO Purse Seine Tun   | 3 | 5 | 5 | 4 | 5 | 2 | 4 | 5 | 5 |
| Sherbro              | 2 | 2 | 1 | 1 | 1 | 1 | 2 | 1 | 5 |
| Tombo                | 3 | 3 | 1 | 1 | 1 | 1 | 2 | 2 | 5 |
| Baltic Cod           | 4 | 3 | 5 | 3 | 5 | 4 | 3 | 5 | 5 |
| Longline Tuna        | 5 | 5 | 5 | 4 | 5 | 5 | 5 | 5 | 5 |
| Lake Victoria Daga   | 2 | 3 | 1 | 3 | 1 | 1 | 4 | 2 | 5 |
| Lake Victoria Tilapi | 3 | 2 | 1 | 3 | 1 | 1 | 4 | 4 | 5 |
| Nile Perch           | 4 | 4 | 5 | 3 | 5 | 2 | 4 | 2 | 2 |
| AK Pollock           | 4 | 4 | 5 | 3 | 5 | 5 | 4 | 5 | 4 |
| FL Spiny Lobster     | 4 | 4 | 5 | 3 | 5 | 3 | 5 | 5 | 5 |
| Louisiana Shrimp     | 3 | 2 | 5 | 3 | 4 | 5 | 5 | 5 | 5 |
| AK Salmon            | 4 | 4 | 5 | 2 | 5 | 4 | 2 | 3 | 2 |
| NE Groundfish        | 4 | 3 | 5 | 4 | 5 | 4 | 4 | 4 | 5 |
| CA Urchin            | 5 | 4 | 5 | 4 | 5 | 5 | 5 | 4 | 5 |
| OR Dungeness Crab    | 4 | 2 | 4 | 3 | 5 | 4 | 4 | 4 | 3 |
| AK Crab              | 5 | 5 | 5 | 3 | 5 | 5 | 5 | 5 | 5 |
| AK Halibut           | 5 | 2 | 5 | 5 | 5 | 2 | 4 | 4 | 3 |
| Pacific Groundfish   | 5 | 3 | 5 | 3 | 5 | 4 | 1 | 3 | 5 |
| Thanh Hoa            | 3 | 3 | 2 | 3 | 3 | 4 | 2 | 2 | 4 |
| Southern Zone Roc    | 5 | 5 | 5 | 5 | 4 | 2 | 5 | 4 | 4 |
| Western Zone Aba     | 5 | 5 | 5 | 5 | 4 | 2 | 5 | 4 | 4 |

|                      |   |   |   |   |   |   |   |   |   |
|----------------------|---|---|---|---|---|---|---|---|---|
| Hoki                 | 4 | 5 | 5 | 4 | 4 | 4 | 5 | 4 | 5 |
| Cod                  | 3 | 5 | 5 | 3 | 3 | 4 | 2 | 4 | 5 |
| Purse Seiners        | 3 | 5 | 5 | 3 | 3 | 4 | 2 | 4 | 5 |
| Anchovy              | 4 | 2 | 4 | 4 | 4 | 4 | 5 | 5 | 5 |
| Blue Crab            | 4 | 2 | 1 | 4 | 2 | 4 | 4 | 3 | 5 |
| Artisanal            | 4 | 4 | 4 | 2 | 3 | 3 | 5 | 5 | 5 |
| Artisanal Ngaparou   | 4 | 3 | 2 | 1 | 3 | 4 | 3 | 4 | 4 |
| Inshore Artisanal    | 4 | 4 | 3 | 5 | 3 | 4 | 5 | 5 | 5 |
| Semi-Industrial      | 4 | 4 | 4 | 5 | 3 | 4 | 5 | 5 | 5 |
| Sea Cucumber         | 5 | 4 | 4 | 4 | 3 | 4 | 5 | 5 | 5 |
| IO Purse Seine Tun   | 5 | 4 | 4 | 2 | 4 | 3 | 5 | 5 | 5 |
| Sherbro              | 2 | 1 | 2 | 2 | 2 | 3 | 2 | 5 | 3 |
| Tombo                | 2 | 1 | 3 | 1 | 2 | 4 | 4 | 4 | 3 |
| Baltic Cod           | 5 | 5 | 4 | 4 | 4 | 3 | 4 | 4 | 5 |
| Longline Tuna        | 5 | 5 | 5 | 5 | 5 | 3 | 5 | 5 | 5 |
| Lake Victoria Daga   | 1 | 2 | 5 | 1 | 2 | 4 | 4 | 4 | 2 |
| Lake Victoria Tilapi | 4 | 5 | 5 | 2 | 2 | 4 | 4 | 4 | 2 |
| Nile Perch           | 2 | 3 | 4 | 3 | 5 | 4 | 5 | 5 | 5 |
| AK Pollock           | 5 | 5 | 4 | 5 | 5 | 3 | 5 | 5 | 5 |
| FL Spiny Lobster     | 5 | 5 | 5 | 3 | 3 | 2 | 3 | 4 | 5 |
| Louisiana Shrimp     | 2 | 5 | 5 | 3 | 4 | 3 | 3 | 4 | 5 |
| AK Salmon            | 4 | 5 | 4 | 2 | 3 | 3 | 4 | 4 | 5 |
| NE Groundfish        | 3 | 5 | 3 | 3 | 4 | 3 | 4 | 4 | 5 |
| CA Urchin            | 5 | 5 | 5 | 4 | 3 | 3 | 3 | 4 | 5 |
| OR Dungeness Crab    | 2 | 5 | 3 | 4 | 3 | 4 | 2 | 2 | 5 |
| AK Crab              | 5 | 5 | 4 | 5 | 4 | 3 | 5 | 3 | 5 |
| AK Halibut           | 4 | 5 | 4 | 3 | 4 | 4 | 4 | 4 | 5 |
| Pacific Groundfish   | 4 | 5 | 5 | 4 | 4 | 4 | 2 | 2 | 5 |
| Thanh Hoa            | 2 | 2 | 4 | 3 | 3 | 4 | 4 | 4 | 3 |
| Southern Zone Roc    | 5 | 5 | 5 | 4 | 4 | 4 | 4 | 5 | 5 |
| Western Zone Aba     | 2 | 5 | 5 | 4 | 4 | 4 | 4 | 5 | 5 |

|                      |   |   |   |   |   |   |   |   |   |
|----------------------|---|---|---|---|---|---|---|---|---|
| Hoki                 | 5 | 4 | 4 | 3 | 3 | 5 | 5 | 3 | 4 |
| Cod                  | 5 | 4 | 3 | 4 | 4 | 5 | 5 | 2 | 3 |
| Purse Seiners        | 5 | 4 | 3 | 4 | 4 | 5 | 5 | 2 | 3 |
| Anchovy              | 5 | 4 | 4 | 4 | 4 | 3 | 4 | 3 | 5 |
| Blue Crab            | 5 | 5 | 3 | 2 | 2 | 2 | 2 | 3 | 4 |
| Artisanal            | 4 | 4 | 3 | 4 | 5 | 3 | 3 | 2 | 5 |
| Artisanal Ngaparou   | 3 | 3 | 1 | 3 | 4 | 4 | 3 | 3 | 5 |
| Inshore Artisanal    | 5 | 4 | 1 | 3 | 3 | 5 | 5 | 3 | 5 |
| Semi-Industrial      | 5 | 4 | 1 | 2 | 2 | 5 | 5 | 2 | 5 |
| Sea Cucumber         | 5 | 4 | 4 | 4 | 4 | 5 | 5 | 2 | 5 |
| IO Purse Seine Tun   | 5 | 5 | 5 | 3 | 2 | 4 | 3 | 2 | 3 |
| Sherbro              | 3 | 3 | 5 | 2 | 4 | 3 | 3 | 2 | 5 |
| Tombo                | 4 | 3 | 5 | 4 | 4 | 3 | 4 | 2 | 5 |
| Baltic Cod           | 5 | 4 | 5 | 4 | 4 | 5 | 5 | 2 | 5 |
| Longline Tuna        | 5 | 5 | 5 | 4 | 3 | 5 | 5 | 4 | 5 |
| Lake Victoria Daga   | 2 | 2 | 5 | 3 | 2 | 2 | 2 | 2 | 5 |
| Lake Victoria Tilapi | 2 | 2 | 5 | 4 | 3 | 2 | 2 | 2 | 5 |
| Nile Perch           | 3 | 5 | 2 | 3 | 3 | 5 | 3 | 3 | 5 |
| AK Pollock           | 5 | 5 | 1 | 2 | 4 | 4 | 4 | 2 | 1 |
| FL Spiny Lobster     | 5 | 4 | 5 | 3 | 4 | 5 | 5 | 2 | 4 |
| Louisiana Shrimp     | 5 | 4 | 5 | 2 | 3 | 5 | 4 | 2 | 3 |
| AK Salmon            | 5 | 4 | 3 | 3 | 3 | 5 | 5 | 2 | 2 |
| NE Groundfish        | 5 | 4 | 4 | 3 | 2 | 5 | 5 | 2 | 3 |
| CA Urchin            | 5 | 3 | 5 | 1 | 1 | 4 | 4 | 2 | 3 |
| OR Dungeness Cral    | 5 | 3 | 3 | 3 | 3 | 5 | 5 | 3 | 2 |
| AK Crab              | 5 | 4 | 3 | 4 | 3 | 5 | 5 | 2 | 3 |
| AK Halibut           | 5 | 4 | 2 | 2 | 2 | 4 | 5 | 2 | 3 |
| Pacific Groundfish   | 5 | 4 | 2 | 2 | 2 | 2 | 5 | 5 | 3 |
| Thanh Hoa            | 3 | 3 | 5 | 2 | 2 | 2 | 2 | 2 | 5 |
| Southern Zone Roc    | 5 | 4 | 5 | 4 | 4 | 3 | 5 | 5 | 5 |
| Western Zone Aba     | 5 | 4 | 5 | 4 | 4 | 3 | 5 | 5 | 5 |

|                      |   |   |   |   |   |   |   |   |   |
|----------------------|---|---|---|---|---|---|---|---|---|
| Hoki                 | 4 | 4 | 5 | 5 | 5 | 5 | 5 | 5 | 4 |
| Cod                  | 2 | 5 | 5 | 5 | 5 | 5 | 5 | 5 | 5 |
| Purse Seiners        | 2 | 5 | 5 | 5 | 5 | 5 | 5 | 5 | 5 |
| Anchovy              | 4 | 4 | 5 | 4 | 5 | 5 | 5 | 3 | 3 |
| Blue Crab            | 3 | 4 | 5 | 4 | 5 | 5 | 5 | 3 | 2 |
| Artisanal            | 4 | 1 | 5 | 5 | 5 | 4 | 4 | 2 | 2 |
| Artisanal Ngaparou   | 5 | 1 | 5 | 4 | 5 | 5 | 5 | 1 | 3 |
| Inshore Artisanal    | 4 | 4 | 5 | 5 | 5 | 4 | 5 | 3 | 4 |
| Semi-Industrial      | 4 | 4 | 5 | 5 | 2 | 5 | 5 | 3 | 4 |
| Sea Cucumber         | 3 | 4 | 5 | 5 | 5 | 2 | 5 | 3 | 4 |
| IO Purse Seine Tun   | 3 | 4 | 5 | 5 | 4 | 5 | 5 | 5 | 4 |
| Sherbro              | 5 | 1 | 5 | 5 | 5 | 5 | 5 | 1 | 2 |
| Tombo                | 5 | 1 | 5 | 5 | 2 | 2 | 4 | 1 | 2 |
| Baltic Cod           | 4 | 5 | 5 | 5 | 3 | 2 | 4 | 5 | 5 |
| Longline Tuna        | 5 | 4 | 5 | 5 | 5 | 5 | 5 | 5 | 4 |
| Lake Victoria Daga   | 2 | 2 | 5 | 5 | 4 | 4 | 5 | 2 | 2 |
| Lake Victoria Tilapi | 3 | 2 | 5 | 5 | 4 | 4 | 5 | 2 | 2 |
| Nile Perch           | 4 | 2 | 5 | 5 | 4 | 4 | 5 | 2 | 2 |
| AK Pollock           | 4 | 5 | 5 | 5 | 5 | 5 | 5 | 5 | 5 |
| FL Spiny Lobster     | 4 | 4 | 3 | 3 | 4 | 4 | 5 | 4 | 4 |
| Louisiana Shrimp     | 2 | 4 | 5 | 5 | 3 | 4 | 4 | 5 | 4 |
| AK Salmon            | 1 | 4 | 4 | 5 | 5 | 5 | 5 | 5 | 5 |
| NE Groundfish        | 4 | 4 | 4 | 5 | 4 | 5 | 5 | 5 | 5 |
| CA Urchin            | 4 | 3 | 5 | 4 | 5 | 4 | 5 | 5 | 4 |
| OR Dungeness Crab    | 3 | 4 | 4 | 5 | 5 | 5 | 5 | 5 | 4 |
| AK Crab              | 3 | 2 | 5 | 4 | 5 | 5 | 5 | 5 | 4 |
| AK Halibut           | 4 | 4 | 4 | 5 | 5 | 5 | 5 | 5 | 5 |
| Pacific Groundfish   | 3 | 4 | 5 | 5 | 5 | 5 | 5 | 5 | 4 |
| Thanh Hoa            | 4 | 2 | 5 | 3 | 4 | 4 | 5 | 2 | 2 |
| Southern Zone Roc    | 4 | 5 | 4 | 4 | 5 | 5 | 5 | 5 | 5 |
| Western Zone Aba     | 4 | 5 | 4 | 4 | 5 | 5 | 5 | 5 | 5 |



|                      |   |   |   |   |   |   |   |   |   |
|----------------------|---|---|---|---|---|---|---|---|---|
| Hoki                 | 5 | 5 | 5 | 5 | 5 | 5 | 4 | 2 | 5 |
| Cod                  | 4 | 4 | 5 | 4 | 4 | 4 | 3 | 2 | 4 |
| Purse Seiners        | 4 | 4 | 5 | 4 | 4 | 4 | 3 | 3 | 4 |
| Anchovy              | 3 | 4 | 4 | 3 | 3 | 4 | 4 | 2 | 1 |
| Blue Crab            |   |   |   |   |   | 1 | 2 | 1 | 2 |
| Artisanal            |   |   |   |   |   | 3 | 3 | 1 | 2 |
| Artisanal Ngaparou   |   |   |   |   |   | 4 |   | 2 | 4 |
| Inshore Artisanal    |   |   |   |   |   | 2 | 3 | 2 | 4 |
| Semi-Industrial      |   |   |   |   |   | 5 | 3 | 3 | 2 |
| Sea Cucumber         |   |   |   |   |   | 2 | 4 | 4 | 2 |
| IO Purse Seine Tun   |   |   |   |   |   | 3 | 5 | 5 | 3 |
| Sherbro              |   |   |   |   |   | 3 | 2 | 2 | 4 |
| Tombo                |   |   |   |   |   | 4 | 3 | 2 | 5 |
| Baltic Cod           | 2 | 4 | 2 | 2 | 4 | 5 | 4 | 1 | 2 |
| Longline Tuna        | 3 | 5 | 3 | 5 | 1 | 4 | 3 | 3 | 3 |
| Lake Victoria Daga   |   |   |   |   |   | 5 | 2 | 1 | 4 |
| Lake Victoria Tilapi |   |   |   |   |   | 5 | 2 | 1 | 4 |
| Nile Perch           |   |   |   |   |   | 5 | 2 | 1 | 4 |
| AK Pollock           | 3 | 5 | 5 | 4 | 4 | 5 | 5 | 4 | 5 |
| FL Spiny Lobster     |   |   |   |   |   | 1 | 3 | 2 | 2 |
| Louisiana Shrimp     |   |   |   |   |   | 1 | 3 | 2 | 4 |
| AK Salmon            |   |   |   |   |   | 4 | 2 | 2 | 2 |
| NE Groundfish        | 3 | 3 | 4 | 2 | 2 | 5 | 3 | 1 | 5 |
| CA Urchin            |   |   |   |   |   | 5 | 4 | 3 | 3 |
| OR Dungeness Crab    |   |   |   |   |   | 4 | 3 | 3 | 3 |
| AK Crab              | 4 | 5 | 5 | 3 | 5 | 5 | 4 | 3 | 3 |
| AK Halibut           | 5 | 5 | 5 | 3 | 3 | 3 | 3 | 2 | 3 |
| Pacific Groundfish   | 3 | 4 | 5 | 4 | 4 | 4 | 3 | 2 | 5 |
| Thanh Hoa            |   |   |   |   |   | 3 | 1 | 2 | 1 |
| Southern Zone Roc    | 5 | 5 | 5 | 4 | 4 | 4 | 4 | 3 | 5 |
| Western Zone Aba     | 5 | 5 | 5 | 4 | 4 | 4 | 4 | 3 | 5 |

|                      |   |   |   |   |   |   |   |   |   |
|----------------------|---|---|---|---|---|---|---|---|---|
| Hoki                 | 5 | 5 | 4 | 2 | 2 | 2 | 3 | 4 | 4 |
| Cod                  | 3 | 2 | 4 | 1 | 1 | 1 | 3 | 2 | 5 |
| Purse Seiners        | 3 | 2 | 4 | 1 | 1 | 1 | 3 | 2 | 5 |
| Anchovy              | 1 | 3 | 3 | 1 | 3 | 1 | 4 | 5 | 3 |
| Blue Crab            | 1 | 1 | 3 | 3 | 3 | 1 | 5 | 5 | 2 |
| Artisanal            | 2 | 3 | 4 | 3 | 2 | 1 | 5 | 5 | 2 |
| Artisanal Ngaparou   | 3 | 2 | 4 | 3 | 1 | 1 | 4 | 3 | 3 |
| Inshore Artisanal    | 1 | 5 | 4 | 1 | 1 | 1 | 3 | 4 | 2 |
| Semi-Industrial      | 1 | 5 | 4 | 1 | 1 | 1 | 3 | 4 | 4 |
| Sea Cucumber         | 2 | 5 | 4 | 1 | 1 | 1 | 2 | 5 | 4 |
| IO Purse Seine Tun   | 1 | 5 | 5 | 1 | 1 | 1 | 4 | 5 | 3 |
| Sherbro              | 1 | 2 | 3 | 3 | 3 | 1 | 5 | 5 | 2 |
| Tombo                | 3 | 5 | 4 | 3 | 3 | 1 | 5 | 5 | 3 |
| Baltic Cod           | 1 | 2 | 3 | 1 | 1 | 1 | 1 | 1 | 4 |
| Longline Tuna        | 1 | 5 | 5 | 1 | 1 | 1 | 1 | 5 | 2 |
| Lake Victoria Daga   | 2 | 2 | 2 | 2 | 2 | 1 | 5 | 5 | 2 |
| Lake Victoria Tilapi | 2 | 2 | 2 | 1 | 1 | 1 | 4 | 5 | 2 |
| Nile Perch           | 2 | 2 | 2 | 2 | 2 | 1 | 3 | 4 | 2 |
| AK Pollock           | 4 | 5 | 3 | 1 | 2 | 1 | 1 | 4 | 5 |
| FL Spiny Lobster     | 3 | 3 | 3 | 1 | 1 | 1 | 1 | 5 | 4 |
| Louisiana Shrimp     | 3 | 3 | 4 | 4 | 3 | 2 | 4 | 5 | 4 |
| AK Salmon            | 1 | 3 | 3 | 3 | 2 | 1 | 3 | 3 | 5 |
| NE Groundfish        | 2 | 4 | 2 | 2 | 2 | 1 | 2 | 4 | 2 |
| CA Urchin            | 3 | 4 | 5 | 3 | 2 | 1 | 4 | 4 | 5 |
| OR Dungeness Cral    | 3 | 3 | 3 | 2 | 3 | 1 | 2 | 4 | 5 |
| AK Crab              | 3 | 5 | 3 | 1 | 3 | 1 | 2 | 3 | 3 |
| AK Halibut           | 4 | 4 | 3 | 2 | 2 | 1 | 2 | 4 | 5 |
| Pacific Groundfish   | 2 | 3 | 4 | 3 | 3 | 1 | 1 | 4 | 5 |
| Thanh Hoa            | 1 | 4 | 3 | 2 | 3 | 1 | 1 | 5 | 2 |
| Southern Zone Roc    | 5 | 5 | 5 | 1 | 2 | 1 | 1 | 4 | 4 |
| Western Zone Aba     | 5 | 5 | 5 | 1 | 2 | 1 | 1 | 4 | 4 |



|                      |   |   |   |   |   |   |   |   |   |
|----------------------|---|---|---|---|---|---|---|---|---|
| Hoki                 | 5 | 5 | 4 | 4 | 4 | 5 | 5 | 3 | 4 |
| Cod                  | 4 | 4 | 5 | 4 | 2 | 2 | 3 | 4 | 5 |
| Purse Seiners        | 4 | 4 | 5 | 4 | 2 | 2 | 3 | 4 | 5 |
| Anchovy              | 3 | 5 | 5 | 4 | 2 | 2 | 4 | 1 | 2 |
| Blue Crab            | 3 | 5 | 4 | 2 | 3 | 1 | 1 | 1 | 1 |
| Artisanal            | 1 | 4 | 3 | 3 | 2 | 2 | 1 | 2 | 2 |
| Artisanal Ngaparou   | 4 | 1 | 2 | 5 | 5 | 4 | 1 | 4 | 3 |
| Inshore Artisanal    | 2 | 3 | 4 | 4 | 3 | 1 | 1 | 1 | 3 |
| Semi-Industrial      | 5 | 3 | 4 | 4 | 1 | 1 | 1 | 1 | 3 |
| Sea Cucumber         | 5 | 3 | 4 | 4 | 4 | 1 | 1 | 1 | 4 |
| IO Purse Seine Tun   | 4 | 2 | 4 | 5 | 1 | 1 | 1 | 1 | 4 |
| Sherbro              | 1 | 5 | 2 | 1 | 2 | 2 | 1 | 4 | 3 |
| Tombo                | 3 | 5 | 3 | 2 | 1 | 1 | 1 | 5 | 3 |
| Baltic Cod           | 4 | 2 | 5 | 5 | 3 | 2 | 4 | 2 | 4 |
| Longline Tuna        | 4 | 3 | 2 | 2 | 1 | 1 | 1 | 4 | 2 |
| Lake Victoria Daga   | 4 | 5 | 2 | 3 | 1 | 1 | 1 | 2 | 3 |
| Lake Victoria Tilapi | 4 | 5 | 2 | 3 | 1 | 1 | 1 | 2 | 3 |
| Nile Perch           | 1 | 5 | 4 | 3 | 1 | 1 | 1 | 4 | 3 |
| AK Pollock           | 5 | 5 | 5 | 5 | 3 | 1 | 5 | 1 | 4 |
| FL Spiny Lobster     | 1 | 5 | 5 | 5 | 5 | 1 | 5 | 1 | 2 |
| Louisiana Shrimp     | 4 | 5 | 5 | 4 | 2 | 1 | 1 | 5 | 5 |
| AK Salmon            | 5 | 5 | 5 | 5 | 4 | 2 | 5 | 3 | 5 |
| NE Groundfish        | 4 | 4 | 5 | 5 | 3 | 1 | 2 | 4 | 5 |
| CA Urchin            | 5 | 5 | 4 | 3 | 3 | 1 | 1 | 2 | 3 |
| OR Dungeness Crab    | 5 | 3 | 4 | 3 | 5 | 5 | 4 | 2 | 3 |
| AK Crab              | 4 | 5 | 5 | 5 | 4 | 5 | 4 | 5 | 4 |
| AK Halibut           | 5 | 4 | 5 | 4 | 2 | 2 | 5 | 1 | 4 |
| Pacific Groundfish   | 5 | 5 | 5 | 5 | 4 | 1 | 5 | 1 | 3 |
| Thanh Hoa            | 1 | 5 | 2 | 2 | 1 | 1 | 1 | 2 | 2 |
| Southern Zone Roc    | 5 | 5 | 5 | 4 | 3 | 3 | 5 | 2 | 4 |
| Western Zone Aba     | 5 | 5 | 5 | 4 | 3 | 3 | 5 | 2 | 4 |

|                      |   |   |   |   |   |   |   |   |   |
|----------------------|---|---|---|---|---|---|---|---|---|
| Hoki                 | 2 | 5 | 5 | 4 | 4 | 4 | 5 | 4 | 5 |
| Cod                  | 5 | 3 | 4 | 5 | 5 | 4 | 5 | 5 | 5 |
| Purse Seiners        | 5 | 3 | 4 | 5 | 5 | 4 | 5 | 5 | 5 |
| Anchovy              | 5 | 3 | 5 | 5 | 4 | 4 | 4 | 3 | 3 |
| Blue Crab            | 5 | 1 | 1 | 5 | 3 | 2 | 2 | 2 | 2 |
| Artisanal            | 2 | 3 | 1 | 4 | 3 | 2 | 3 | 2 | 3 |
| Artisanal Ngaparou   | 5 | 4 | 5 | 3 | 4 | 2 | 5 | 5 | 2 |
| Inshore Artisanal    | 5 | 4 | 5 | 5 | 4 | 3 | 2 | 2 | 4 |
| Semi-Industrial      | 3 | 2 | 5 | 5 | 4 | 3 | 4 | 2 | 4 |
| Sea Cucumber         | 4 | 3 | 5 | 5 | 4 | 3 | 4 | 2 | 4 |
| IO Purse Seine Tun   | 3 | 3 | 5 | 5 | 4 |   | 5 | 5 | 4 |
| Sherbro              | 5 | 5 | 5 | 5 | 1 | 1 | 2 | 3 | 3 |
| Tombo                | 5 | 5 | 5 | 5 | 1 | 3 | 3 | 2 | 3 |
| Baltic Cod           | 3 | 1 | 3 | 4 | 4 | 4 | 5 | 3 | 5 |
| Longline Tuna        | 5 | 1 | 4 | 5 | 5 | 5 | 5 | 5 | 5 |
| Lake Victoria Daga   | 5 | 3 | 3 | 5 | 3 | 2 | 2 | 2 | 3 |
| Lake Victoria Tilapi | 5 | 2 | 3 | 5 | 3 | 2 | 2 | 2 | 3 |
| Nile Perch           | 5 | 2 | 5 | 4 | 3 | 2 | 2 | 3 | 3 |
| AK Pollock           | 3 | 4 | 4 | 4 | 4 | 2 | 5 | 5 | 4 |
| FL Spiny Lobster     | 3 | 2 | 5 | 4 | 4 | 4 | 5 | 5 | 5 |
| Louisiana Shrimp     | 5 | 1 | 2 | 4 | 4 | 4 | 5 | 5 | 4 |
| AK Salmon            | 2 | 2 | 5 | 5 | 4 | 2 | 5 | 3 | 4 |
| NE Groundfish        | 4 | 2 | 5 | 5 | 5 | 5 | 5 | 4 | 5 |
| CA Urchin            | 3 | 1 | 2 | 4 | 4 | 4 | 5 | 4 | 5 |
| OR Dungeness Cral    | 3 | 2 | 5 | 4 | 4 | 4 | 5 | 4 | 5 |
| AK Crab              | 2 | 2 | 5 | 5 | 5 | 5 | 5 | 5 | 5 |
| AK Halibut           | 5 | 2 | 5 | 5 | 3 | 3 | 5 | 5 | 4 |
| Pacific Groundfish   | 3 | 3 | 5 | 5 | 4 | 5 | 5 | 4 | 5 |
| Thanh Hoa            | 2 | 2 | 5 | 4 | 4 | 2 | 2 | 3 | 4 |
| Southern Zone Roc    | 3 | 4 | 4 | 4 | 5 | 4 | 5 | 4 | 5 |
| Western Zone Aba     | 3 | 4 | 4 | 4 | 5 | 4 | 5 | 4 | 5 |

|                      |     |   |   |   |   |   |   |   |
|----------------------|-----|---|---|---|---|---|---|---|
| Hoki                 | 5 A | A | B | B | B | B | A | B |
| Cod                  | 5 A | A | A | A | A | A | C | A |
| Purse Seiners        | 5 A | A | A | A | A | A | C | A |
| Anchovy              | 3 A | B | B | B | C | C | B | B |
| Blue Crab            | 3 A | A | B | B | A | A | A | A |
| Artisanal            | 3 A | A | B | A | A | A | A | B |
| Artisanal Ngaparou   | 4 B | B | B | B | A | B | B | A |
| Inshore Artisanal    | 4 A | A | B | B | A | A | A | A |
| Semi-Industrial      | 5 A | B | B | B | A | A | A | A |
| Sea Cucumber         | 4 A | B | B | B | A | A | A | A |
| IO Purse Seine Tun   | 5 A | A | A | A | A | B | B | A |
| Sherbro              | 3 b | B | C | C | A | B | B | a |
| Tombo                | 4 b | B | C | C | A | B | B | b |
| Baltic Cod           | 5 A | A | A | A | A | A | A | A |
| Longline Tuna        | 5 A | B | B | B | A | A | B | A |
| Lake Victoria Daga   | 1 A | A | A | A | A | A | A | A |
| Lake Victoria Tilapi | 3 A | A | A | A | A | A | A | A |
| Nile Perch           | 3 A | A | B | B | B | A | C | A |
| AK Pollock           | 5 A | A | A | A | A | A | B | A |
| FL Spiny Lobster     | 5 A | A | B | B | B | A | C | B |
| Louisiana Shrimp     | 4 A | A | B | B | A | A | B | C |
| AK Salmon            | 3 A | B | A | A | B | A | B | A |
| NE Groundfish        | 5 A | A | A | A | B | A | B | A |
| CA Urchin            | 5 A | C | C | C | A | A | B | B |
| OR Dungeness Crab    | 5 A | A | A | A | B | A | A | A |
| AK Crab              | 5 A | A | A | A | C | B | A | A |
| AK Halibut           | 5 A | A | A | A | A | B | B | A |
| Pacific Groundfish   | 5 A | A | B | B | A | B | A | B |
| Thanh Hoa            | 4 A | B | B | B | B | A | C | C |
| Southern Zone Roc    | 5 A | A | A | A | A | A | A | A |
| Western Zone Aba     | 5 A | A | A | A | A | A | A | A |

|                      |   |   |   |   |   |   |   |   |   |
|----------------------|---|---|---|---|---|---|---|---|---|
| Hoki                 | A | B | A | B | A | B | B | B | A |
| Cod                  | B | B | B | A | B | A | C | B | A |
| Purse Seiners        | B | B | B | A | B | A | C | B | A |
| Anchovy              | A | B | A | A | A | A | A | C | C |
| Blue Crab            | A | B | A | A | B | B | A | A | A |
| Artisanal            | C | A | A | A | A | B | C | B | B |
| Artisanal Ngaparou   | A | C | A | A | C | C | C | B | A |
| Inshore Artisanal    | A | B | A | B | A | C | A | A | A |
| Semi-Industrial      | A | B | C | A | A | C | A | A | A |
| Sea Cucumber         | A | B | A | B | A | C | A | A | A |
| IO Purse Seine Tun   | A | B | A | A | A | B | B | B | A |
| Sherbro              | c | c | a | c | c | c | c | b | a |
| Tombo                | b | c | a | a | b | c | b | a | a |
| Baltic Cod           | B | B | B | A | C | B | A | A | A |
| Longline Tuna        | B | B | A | C | B | B | C | A | A |
| Lake Victoria Daga   | A | C | A |   | A | A | A | B | B |
| Lake Victoria Tilapi | A | C | A | A | A | A | A | B | B |
| Nile Perch           | A | A | A | C | A | A | A | A | B |
| AK Pollock           | A | B | A | B | A | A | A | B | B |
| FL Spiny Lobster     | A | B | B | A | B | A | A | A | A |
| Louisiana Shrimp     | B | C | B | C | C | B | C | C | B |
| AK Salmon            | B | B | B | B | B | A | A | B | B |
| NE Groundfish        | A | B | A | A | A | A | B | B | A |
| CA Urchin            | B | B | A | B | B | A | B | B | B |
| OR Dungeness Crab    | A | A | A | B | B | A | B | A | A |
| AK Crab              | A | A | A | A | B | A | C | C | C |
| AK Halibut           | B | B | A | B | B | A | B | B | A |
| Pacific Groundfish   | A | B | A | A | C | A | C | B | B |
| Thanh Hoa            | C | B | B | C | C | C | C | C | B |
| Southern Zone Roc    | B | A | A | A | B | A | A | B | B |
| Western Zone Aba     | B | A | A | A | B | A | A | B | B |



|                      |   |   |   |   |   |   |   |   |   |
|----------------------|---|---|---|---|---|---|---|---|---|
| Hoki                 | B | A | A | B | C | C | C | A | A |
| Cod                  | B | A | A | B | C | B | B | B | B |
| Purse Seiners        | B | A | A | B | C | B | B | B | B |
| Anchovy              | B | B | B | A | B | B | B | A | B |
| Blue Crab            | B | B | A | B | A | B | A | B | A |
| Artisanal            | A | A | B | B | A | B | B | A | B |
| Artisanal Ngaparou   | C | B | A | B | A | C | C | B | A |
| Inshore Artisanal    | A | A | A | A | A | A | A | A | A |
| Semi-Industrial      | A | A | A | A | A | A | A | A | A |
| Sea Cucumber         | A | A | A | A | A | A | A | A | A |
| IO Purse Seine Tun   | B | A | A | B | A | A | A | C | C |
| Sherbro              | b | b | a | b | a | c | b | b | a |
| Tombo                | b | b | a | a | b | c | c | b | a |
| Baltic Cod           | B | A | A | B | A | B | B | A | A |
| Longline Tuna        | A | A | A | A | A | B | B | B | B |
| Lake Victoria Daga   | A | A | A | A | A | B | B | A | A |
| Lake Victoria Tilapi | A | A | A | A | A | B | B | A | A |
| Nile Perch           | A | A | A | B | A | B | B | A | A |
| AK Pollock           | A | A | A | A | B | B | B | A | A |
| FL Spiny Lobster     | B | A | A | B | A | B | B | A | A |
| Louisiana Shrimp     | B | A | A | A | A | C | B | A | A |
| AK Salmon            | B | A | B | B | A | A | A | A | B |
| NE Groundfish        | B | A | A | A | B | B | B | A | A |
| CA Urchin            | B | A | B | C | B | C | C | B | B |
| OR Dungeness Crab    | A | A | A | A | A | A | A | A | A |
| AK Crab              | C | A | A | A | C | C | B | A | A |
| AK Halibut           | B | A | A | B | B | B | B | B | A |
| Pacific Groundfish   | C | A | A | C | A | C | C | A | A |
| Thanh Hoa            | B | B | B | B | A | B | B | A | B |
| Southern Zone Roc    | A | A | A | A | A | B | A | A | A |
| Western Zone Aba     | A | A | A | A | A | B | A | A | A |

|                      |   |   |   |   |   |   |   |   |   |
|----------------------|---|---|---|---|---|---|---|---|---|
| Hoki                 | B | C | C | C | C | B | B | C | C |
| Cod                  | B | B | B | B | B | A | A | A | A |
| Purse Seiners        | B | B | B | B | B | A | A | A | A |
| Anchovy              | A | A | B | C | A | A | A | A | A |
| Blue Crab            | B | A | B | A | B | B | B | A | C |
| Artisanal            | B | B | B | A | C | B | A | B | C |
| Artisanal Ngaparou   | A | A | A | B | C | A | C | A | B |
| Inshore Artisanal    | A | A | A | A | A | A | A | A | B |
| Semi-Industrial      | A | A | A | A | A | A | A | A | B |
| Sea Cucumber         | A | A | A | A | A | A | A | A | C |
| IO Purse Seine Tun   | A | B | A | B | B | A | A | A | B |
| Sherbro              | a | a | a | b | b | a | c | a | c |
| Tombo                | a | b | a | b | b | a | b | a | c |
| Baltic Cod           | B | A | A | B | B | A | B | A | B |
| Longline Tuna        | B | A | C | B | B | A | A | A | B |
| Lake Victoria Daga   | A | A | B | C | A | A | A | A | C |
| Lake Victoria Tilapi | A | A | B | B | A | A | B | A | B |
| Nile Perch           | A | A | B | A | A | A | A | A | C |
| AK Pollock           | B | A | A | A | A | B | B | A | A |
| FL Spiny Lobster     | B | B | B | B | A | A | B | A | B |
| Louisiana Shrimp     | A | A | A | A | B | A | A | A | B |
| AK Salmon            | B | B | B | A | A | A | A | A | A |
| NE Groundfish        | B | B | B | B | A | A | A | A | A |
| CA Urchin            | C | B | A | A | B | A | B | A | B |
| OR Dungeness Crab    | A | A | A | B | A | A | B | B | B |
| AK Crab              | A | C | C | C | A | A | A | A | A |
| AK Halibut           | A | B | B | B | A | A | C | A | A |
| Pacific Groundfish   | C | A | A | A | A | A | B | B | B |
| Thanh Hoa            | B | B | B | B | B | B | C | C | C |
| Southern Zone Roc    | B | B | A | A | A | A | A | A | B |
| Western Zone Aba     | B | B | A | A | A | A | A | A | B |

|                      |   |   |   |   |   |   |   |   |   |
|----------------------|---|---|---|---|---|---|---|---|---|
| Hoki                 | B | C | C | C | C | C | A | B | C |
| Cod                  | A | A | B | D | C | B | A | A | B |
| Purse Seiners        | A | A | B | C | C | B | A | A | B |
| Anchovy              | B | A | A | C | A | A | B | B | C |
| Blue Crab            | C | B | B | C | C | B | A | B | B |
| Artisanal            | B | B | A | C | A | A | A | B | B |
| Artisanal Ngaparou   | A | B | C | C | A | B | A | A | A |
| Inshore Artisanal    | A | B | B | A | B | B | A | B | B |
| Semi-Industrial      | A | B | A | A | A | B | A | A | B |
| Sea Cucumber         | A | B | A | A | A | B | B | A | B |
| IO Purse Seine Tun   | A | B | A | A | A | A | B | A | C |
| Sherbro              | a | b | b | c | a | b | a | a | c |
| Tombo                | a | b | b | b | a | b | a | a | a |
| Baltic Cod           | A | A | B | A | A | A | A | A | A |
| Longline Tuna        | A | B | A | A | B | A | B | A | B |
| Lake Victoria Daga   | A | C | B | C | B | A | B | A | C |
| Lake Victoria Tilapi | A | B | B | C | B | B | A | A | C |
| Nile Perch           | A | C | A | C | A | B | B | B | C |
| AK Pollock           | A | A | A | A | A | A | A | A | B |
| FL Spiny Lobster     | A | B | B | B | A | B | A | A | B |
| Louisiana Shrimp     | A | A | A | B | A | A | A | A | C |
| AK Salmon            | A | A | B | B | B | B | B | B | B |
| NE Groundfish        | A | B | A | C | B | A | A | A | B |
| CA Urchin            | A | B | A | B | B | A | A | A | C |
| OR Dungeness Crab    | A | A | A | B | A | A | A | A | A |
| AK Crab              | A | A | A | A | A | A | A | C | C |
| AK Halibut           | A | B | A | B | B | A | A | A | B |
| Pacific Groundfish   | C | C | C | C | A | C | C | C | B |
| Thanh Hoa            | C | C | C | A | B | B | B | C | C |
| Southern Zone Roc    | A | A | B | A | A | A | A | A | B |
| Western Zone Aba     | A | A | B | A | A | A | A | A | B |



|                      |   |   |   |   |   |   |   |   |   |
|----------------------|---|---|---|---|---|---|---|---|---|
| Hoki                 | B | B | B | B | A | A | B | B | C |
| Cod                  | B | C | B | B | A | A | B | B | A |
| Purse Seiners        | B | C | B | B | A | A | B | B | A |
| Anchovy              | C | B | B | B | A | A | B | A | B |
| Blue Crab            | B | B | B | B | A | A | B | B | B |
| Artisanal            | B | A | A | A | B | B | C | A | B |
| Artisanal Ngaparou   | A | B | B | C | B | A | B | A | C |
| Inshore Artisanal    | A | B | A | A | A | A | A | A | A |
| Semi-Industrial      | A | A | A | A | A | A | A | A | A |
| Sea Cucumber         | A | A | A | A | A | A | A | A | B |
| IO Purse Seine Tun   | A | B | A | A | A | A | A | A | B |
| Sherbro              | a | c | c | c | b | a | b | a | c |
| Tombo                | a | b | c | c | b | a | c | b | c |
| Baltic Cod           | A | B | B | A | A | A | A | A | B |
| Longline Tuna        | B | B | A | A | A | A | A | A | B |
| Lake Victoria Daga   | A | A | B | A | B | B | B | A | B |
| Lake Victoria Tilapi | A | A | B | A | B | B | B | A | B |
| Nile Perch           | B | A | B | B | B | B | A | A | A |
| AK Pollock           | B | B | A | A | A | A | A | A | B |
| FL Spiny Lobster     | B | B | B | B | A | A | B | B | B |
| Louisiana Shrimp     | B | C | B | B | A | A | A | A | B |
| AK Salmon            | B | A | B | B | A | B | B | A | B |
| NE Groundfish        | A | A | B | B | A | A | A | A | B |
| CA Urchin            | C | C | C | B | A | B | C | C | B |
| OR Dungeness Crab    | A | A | A | A | A | A | A | A | A |
| AK Crab              | C | C | C | C | C | C | C | C | C |
| AK Halibut           | A | B | B | B | B | A | B | B | B |
| Pacific Groundfish   | B | C | C | C | A | A | C | A | C |
| Thanh Hoa            | C | C | B | A | C | B | C | B | B |
| Southern Zone Roc    | B | B | A | A | A | A | A | B | B |
| Western Zone Aba     | B | B | A | A | A | A | A | B | B |

|                      |   |   |   |   |   |   |   |   |   |
|----------------------|---|---|---|---|---|---|---|---|---|
| Hoki                 | C | B | B | A | B | C | A | A | A |
| Cod                  | A | C | A | A | C | C | A | A | A |
| Purse Seiners        | A | C | A | A | C | C | A | A | A |
| Anchovy              | B | B | B | A | A | B | A | A | B |
| Blue Crab            | B | A | A | A | B | B | B | A | A |
| Artisanal            | C | A | C | C | A | B | A | A | A |
| Artisanal Ngaparou   | C | B | B | A | A | A | B | B | A |
| Inshore Artisanal    | A | A | A | A | A | A | B | A | A |
| Semi-Industrial      | A | A | A | A | A | A | B | A | A |
| Sea Cucumber         | A | A | A | A | A | B | B | A | A |
| IO Purse Seine Tun   | B | B | B | B | A | B | A | A | A |
| Sherbro              | c | b | b | a | a | a | b | b | a |
| Tombo                | c | b | b | a | b | a | b | b | a |
| Baltic Cod           | B | B | A | A | A | A | A | A | A |
| Longline Tuna        | B | A | A | A | A | B | A | A | A |
| Lake Victoria Daga   | A | A | B | A | B | B | A | A | A |
| Lake Victoria Tilapi | B | A | B | A | A | B | A | A | A |
| Nile Perch           | A | A | B | B | A | A | A | A | A |
| AK Pollock           | B | B | B | B | A | B | A | B | A |
| FL Spiny Lobster     | B | B | A | A | B | B | A | B | B |
| Louisiana Shrimp     | B | A | A | A | A | A | A | A | A |
| AK Salmon            | B | A | A | B | A | A | A | A | A |
| NE Groundfish        | B | B | A | A | B | B | A | B | A |
| CA Urchin            | B | B | B | C | C | C | B | B | B |
| OR Dungeness Crab    | A | A | A | A | A | B | A | A | A |
| AK Crab              | C | C | C | C | C | C | A | B | B |
| AK Halibut           | B | B | A | A | B | B | B | B | A |
| Pacific Groundfish   | C | C | A | A | C | C | A | B | A |
| Thanh Hoa            | C | A | B | B | B | B | A | A | C |
| Southern Zone Roc    | B | A | A | A | B | B | A | A | A |
| Western Zone Aba     | B | A | A | A | B | B | A |   |   |



|                      |   |   |   |   |   |   |   |   |   |
|----------------------|---|---|---|---|---|---|---|---|---|
| Hoki                 | A | A | A | A | A | A | A | A | A |
| Cod                  | A | A | B | A | A | A | A | A | A |
| Purse Seiners        | A | A | B | A | A | A | A | A | A |
| Anchovy              | A | A | A | B | A | A | A | A | B |
| Blue Crab            | A | A | A | A | A | A | A | A | A |
| Artisanal            | A | A | A | B | A | A | B | B | A |
| Artisanal Ngaparou   | B | B | B | B | B | A | A | A | A |
| Inshore Artisanal    | A | A | A | A | A | A | A | A | A |
| Semi-Industrial      | A | A | A | A | A | A | A | A | A |
| Sea Cucumber         | A | A | A | A | A | A | A | A | A |
| IO Purse Seine Tun   | A | A | B | B | A |   |   |   |   |
| Sherbro              | b | b | b | b | b |   |   |   |   |
| Tombo                | b | b | b | a | b |   |   |   |   |
| Baltic Cod           | A | B | B | A | C | B | A | B | B |
| Longline Tuna        | B | A | B | A | B | C | A | B | B |
| Lake Victoria Daga   | A | A | A | A | A |   |   |   |   |
| Lake Victoria Tilapi | A | A | A | A | A |   |   |   |   |
| Nile Perch           |   |   |   | A | A |   |   |   |   |
| AK Pollock           | A | A | B | A | A | B | A | A | B |
| FL Spiny Lobster     | A | A | B | A | B | A | B |   | B |
| Louisiana Shrimp     | A | A | A | A | A | A | A | A | A |
| AK Salmon            | A | A | A | A | A | A | A | A | A |
| NE Groundfish        | A | A | A | A | A | A | A | A | A |
| CA Urchin            | A | A | B | B | A |   |   |   |   |
| OR Dungeness Crab    | A | A | A | A | A | A | A | A | A |
| AK Crab              | A | A | A | A | A | A | A | A | A |
| AK Halibut           | A | A | B | B | A | A | A | A | B |
| Pacific Groundfish   | A | A | A | A | B | A | A | A | A |
| Thanh Hoa            | B | B | B | A | A | A | A | A | A |
| Southern Zone Roc    | A | A | A | A | A | A | A | A | A |
| Western Zone Aba     |   |   |   |   | A |   |   |   |   |







|                      |   |   |   |   |   |   |
|----------------------|---|---|---|---|---|---|
| Hoki                 | B | A | A | B | A | A |
| Cod                  | A | B | B | B | A | A |
| Purse Seiners        | A | B | B | B | A | A |
| Anchovy              | A | B | B | B | B | B |
| Blue Crab            | A | A | A | A | A | A |
| Artisanal            | B | A | A | A | A | A |
| Artisanal Ngaparou   | B | A | A | A | A | A |
| Inshore Artisanal    | A | A | A | A | A | A |
| Semi-Industrial      | A | A | A | A | A | A |
| Sea Cucumber         | A | A | A | A | A | A |
| IO Purse Seine Tun   | B |   | A | A | B | A |
| Sherbro              | b | a | a | a | a | a |
| Tombo                | b | a | a | a | a | a |
| Baltic Cod           | A | A | A | B | A | A |
| Longline Tuna        | A | A | A | A | B | A |
| Lake Victoria Daga   | A | A | A | A | A | A |
| Lake Victoria Tilapi | A | A | A | A | A | A |
| Nile Perch           | A | A | A | A | A | A |
| AK Pollock           | A | B | A | A | A | A |
| FL Spiny Lobster     | B | B | A | A | A | A |
| Louisiana Shrimp     | A | A | A | A | A | B |
| AK Salmon            | B | A | A | B | A | B |
| NE Groundfish        | A | A | A | A | A | A |
| CA Urchin            | C | B | B | C | A | A |
| OR Dungeness Crab    | A | A | A | A | A | A |
| AK Crab              | A | A | A | A | A | A |
| AK Halibut           | B | B | A | A | B | A |
| Pacific Groundfish   | C | A | A | C | A | A |
| Thanh Hoa            | C | A | A | A | B | A |
| Southern Zone Roc    | A | A | A | A | A | A |
| Western Zone Aba     |   |   |   |   |   |   |
